# Supplementary material for: Growth under cold conditions in a wide perennial ryegrass panel is under tight physiological control
Source: PeerJ. 2018 Sep 11;6:e5520. doi: 10.7717/peerj.5520 (PMC6138037; doi:10.7717/peerj.5520)
Supplement: Data S1 [file peerj-06-5520-s008.xlsx]

## Sheet: exp 1
accession	treatment	height 13.11.2015	height 13.11.2015	height 13.11.2015	average height 13.11.2015		height 20.11.2015	height 20.11.2015	height 20.11.2015	average height 20.11.2015		height 27.11.2015	height 27.11.2015	height 27.11.2015	average height 27.11.2015	SPAD 27.11.2015	SPAD 27.11.2015	SPAD 27.11.2015	SPAD 27.11.2015	SPAD 27.11.2015	average SPAD 27.11.2015		height 4.12.2015	height 4.12.2015	height 4.12.2015	average height 4.12.2015	SPAD 4.12.2015	SPAD 4.12.2015	SPAD 4.12.2015	SPAD 4.12.2015	SPAD 4.12.2015	average SPAD 4.12.2015		height 11.12.2015	height 11.12.2015	height 11.12.2015	average height 11.12.2015	SPAD 11.12.2015	SPAD 11.12.2015	SPAD 11.12.2015	SPAD 11.12.2015	SPAD 11.12.2015	average SPAD 11.12.2015		height 18.12.2015	height 18.12.2015	height 18.12.2015	average height 18.12.2015
		measurement 1	measurement 2	measurement 3			measurement 1	measurement 2	measurement 3			measurement 1	measurement 2	measurement 3		measurement 1	measurement 2	measurement 3	measurement 4	measurement 5			measurement 1	measurement 2	measurement 3		measurement 1	measurement 2	measurement 3	measurement 4	measurement 5			measurement 1	measurement 2	measurement 3		measurement 1	measurement 2	measurement 3	measurement 4	measurement 5			measurement 1	measurement 2	measurement 3
AberAvon	cold	4.5	5	5	4.83333		7	6	5	6		7	8	6	7	13.5	14.4	14.4	11.6	16.6	14.1		7	8	9	8	35.6	9.3	5.1	13.1	20.8	16.78		7	10	10	9	20.7	15	22.3	14.1	12.8	16.98		9	11	11	10.3333
AberChoice	cold	5.5	4.5	5	5		7	5	6	6		9	8	7	8	17.9	11.1	16.6	14	11.2	14.16		10	9	9	9.33333	27.7	29	15.8	20	18.7	22.24		11	10	12	11	22.6	31	19.4	10.7	24.6	21.66		11	10	14	11.6667
AberClyde	cold	5	5	5.5	5.16667		8	7	5.5	6.83333		9	8	7	8	27.2	29.3	17	28.2	23.9	25.12		9	8	9	8.66667	8.8	28.8	7.9	17.6	21.4	16.9		9	11	9	9.66667	15.9	21.6	24.4	39.2	19.1	24.04		11	10	10	10.3333
AberDart	cold	4.5	5	5	4.83333		6	5	5.5	5.5		6	6	7	6.33333	13.2	11.7	12.4	10.9	11.3	11.9		7	8	8	7.66667	22.2	24	10	10.2	20	17.28		10	7	9	8.66667	37.6	29.1	31	26.5	15.1	27.86		11	11	10	10.6667
AberGain	cold	5	5.5	6	5.5		6.5	5.5	6	6		7	8	8	7.66667	21.1	22.2	25	23.5	26.1	23.58		9	10	11	10	20.9	19.6	27.7	26.6	30.1	24.98		11	12	11	11.3333	21.5	18.5	29.5	26.4	19.3	23.04		13	12	11	12
AberGreen	cold	5	5	5	5		7	7	6.5	6.83333		7.5	8	7	7.5	16.1	23.2	19.1	23.5	19.4	20.26		9	9	10	9.33333	25	21.1	26.7	27.3	27.2	25.46		11	12	12	11.6667	22.1	20.7	27.5	21.5	22.9	22.94		13	12	13	12.6667
AberZeus	cold	5	5	5	5		6	6	6	6		7	8	7	7.33333	21.8	23.9	14.4	17.8	14.8	18.54		8	9	9	8.66667	14.4	24.2	17.1	12.1	7.5	15.06		10	10	10	10	28.2	25.4	14	24.1	27.3	23.8		11	11	11	11
ARARA	cold	5.5	6	4.5	5.33333		6	7	5.5	6.16667		7	7.5	6.5	7	7	5	6.6	13.4	17.9	9.98		10	9	8	9	9.7	27.3	8.3	6.6	21.1	14.6		10	9	9	9.33333	20.9	12.7	30.6	21.3	16.8	20.46		11	9	11	10.3333
AROLUS	cold	5	5	5.5	5.16667		7	6.5	6	6.5		7	7.5	8	7.5	21.3	21.4	16.2	12.3	21.1	18.46		9	9	9	9	21.8	11.6	9.6	16.1	7.4	13.3		9	10	10	9.66667	18.3	23.3	25.7	16.2	16.5	20		12	10	10	10.6667
Astonenergy	cold	6	6	5.5	5.83333		7	5	6	6		7	8.5	8	7.83333	19.9	16.3	20.3	21.8	17.6	19.18		10	9	10	9.66667	17.2	21.3	19	12.7	19.7	17.98		11	11	10	10.6667	21.4	20.6	16.3	22.8	19.9	20.2		10	10	12	10.6667
Ba14088	cold	5.5	6	5.5	5.66667		7	5	6.5	6.16667		7	7	7	7	20.5	13.4	15.4	16.3	17.3	16.58		8	8	9	8.33333	11.8	8.8	15.2	17.6	19.7	14.62		10	10	10	10	16.2	9.8	12.1	10.9	10.1	11.82		11	11	11	11
Ba14125	cold	4.5	5	6	5.16667		6	6	5.5	5.83333		8	7	7	7.33333	15.8	17.5	19	25.8	21.1	19.84		9	9	9	9	7.5	6.5	18.1	19.2	5.2	11.3		10	10	11	10.3333	25	19.6	15.7	21.4	26.5	21.64		12	12	13	12.3333
Ba14155	cold	5.5	5	6	5.5		6	6	7	6.33333		7	8	7	7.33333	18.8	10.8	7.2	10.4	8.3	11.1		10	9.5	9	9.5	9.2	6.6	21.7	7.7	15.2	12.08		10	10	9	9.66667	15	34.7	29.5	15.2	35.6	26		11	12	11	11.3333
BAR01	cold	5	4.5	5	4.83333		6	6	5.5	5.83333		6.5	6	7	6.5	19.9	15.9	14	13	12.2	15		8	8	8	8	11.1	15.4	14.3	6.6	10.2	11.52		10	10	9	9.66667	19.2	19.6	12.3	33.7	16.2	20.2		10	11	9	10
BAR02	cold	4	4.5	5	4.5		7.5	6	5.5	6.33333		6	6	7	6.33333	23.8	21.2	22.5	4.5	8.5	16.1		8	7	8	7.66667	5.6	12.1	20.2	26.6	7	14.3		10	9	9	9.33333	26.3	20.5	8.9	17.9	27.4	20.2		9	11	11	10.3333
BAR03	cold	5	5	5	5		5.5	6	6	5.83333		6.5	6	6	6.16667	23.4	17.7	22.8	23.4	22.4	21.94		8	8	7	7.66667	14.2	20.2	22.4	24.6	26.7	21.62		9	8	8	8.33333	22.3	14.5	39.4	25.2	25.1	25.3		9	10	9	9.33333
BAR04	cold	5	4.5	4.5	4.66667		6	6	6.5	6.16667		7.5	7.5	6.5	7.16667	9	8	9.4	15.6	7.4	9.88		8	8	9	8.33333	9.6	15.2	11.7	23.8	19.9	16.04		10	10	9	9.66667	19	15.1	30.7	29.2	15.3	21.86		11	11	10	10.6667
BAR05	cold	4.5	5	5	4.83333		5	6	6	5.66667		6	7	6	6.33333	29	32.5	22.8	11.7	10.7	21.34		8	7	7	7.33333	18.6	26.4	26.9	18.3	25.9	23.22		8	8	8	8	24.3	19	22.4	24.5	27.1	23.46		9	9	10	9.33333
BAR06	cold	5	4.5	5.5	5		5	6	6	5.66667		7	7	6	6.66667	15	15.5	21.6	15.8	13.5	16.28		7	8	8	7.66667	12.3	13.5	19.7	14.5	26.9	17.38		8	9	9	8.66667	18.2	15.5	22.1	12.2	11	15.8		9	9	10	9.33333
BAR07	cold	5.5	6	5	5.5		6	5	6.5	5.83333		6.5	7	6	6.5	22	10.9	19.1	24.6	15.7	18.46		9	10	9	9.33333	23	14.3	15.5	13.9	27.5	18.84		9	10	10	9.66667	27.4	17.8	30.1	28.8	25.2	25.86		10	9	9	9.33333
BAR08	cold	5	5	5	5		6	6	7	6.33333		8.5	7	7	7.5	24.4	18.8	16.7	27.2	11.2	19.66		8	8	9	8.33333	30.3	7.6	28.3	5	21	18.44		10	11	9	10	22	18.3	30.1	17	38.2	25.12		10	11	8	9.66667
BAR09	cold	5	4.5	4.5	4.66667		4.5	6.5	4.5	5.16667		6	8	4	6	23.2	9.1	16.6	10.4	13.5	14.56		11	9	9	9.66667	20	9.9	12.3	21	9	14.44		10	11	9	10	29	23.2	17.1	17.9	10	19.44		11	11	10	10.6667
BAR10	cold	5	5	4.5	4.83333		6	6	5	5.66667		8	7	7	7.33333	12.7	12.1	9.6	14.8	13.8	12.6		9	9	10	9.33333	10.8	12.5	11.7	16.2	9.1	12.06		11	12	11	11.3333	14.6	15.9	16.1	19.5	16.6	16.54		11	12	13	12
Cancan	cold	6	5	5	5.33333		6	6	5.5	5.83333		7.5	7	7	7.16667	17.7	22.3	25.6	13.5	21.6	20.14		8	8	9	8.33333	22.6	21.6	11.7	16	13.5	17.08		10	9	9	9.33333	22.1	15	25.8	16.6	22.8	20.46		10	11	11	10.6667
Carraig	cold	5	5.5	4.5	5		6	7	6	6.33333		7	7	8.5	7.5	11	13	16	17	18	15		10	10	8	9.33333	15.6	21.1	21.7	8	14.3	16.14		10	10	11	10.3333	15.6	20.5	16.6	29.1	28.9	22.14		10	11	11	10.6667
Cashel	cold	5	4.5	5.5	5		6	6	5.5	5.83333		7	7.5	7	7.16667	13.8	14.4	22.6	30	18.5	19.86		8	8	8	8	32.1	25.8	15.3	33.1	13.2	23.9		10	10	9	9.66667	16.9	19.9	13.5	25.6	26.3	20.44		11	10	12	11
Denver	cold	5.5	5	6	5.5		7	6.5	6	6.5		7	8	7	7.33333	12.6	13.9	11.2	18.1	15.2	14.2		10	10	9	9.66667	15.4	7.4	16.5	9.3	19.3	13.58		11	10	11	10.6667	16.3	30.2	16.6	14.5	22.3	19.98		10	13	12	11.6667
Giant	cold	6	5	5.5	5.5		6.5	7	6	6.5		7	8	8	7.66667	21.4	20.1	28.1	13.1	16.8	19.9		9	10	10	9.66667	26.5	12.4	27.3	24.7	17.7	21.72		10	11	11	10.6667	30.1	33.1	18.3	22.2	32.1	27.16		10	11	12	11
Glencar	cold	5.5	5	5	5.16667		6	7	7	6.66667		8.5	7	8.5	8	21.8	13	22.6	25.6	12.7	19.14		9	9	10	9.33333	29.9	26.1	24.5	14.8	18.6	22.78		11	11	12	11.3333	16.5	23.8	30.1	27.4	30.9	25.74		12	12	11	11.6667
Glenveagh	cold	4.5	5.5	5	5		6	6	5.5	5.83333		7	8	6	7	14.5	15.9	16.5	24.2	26.6	19.54		8	8	9	8.33333	18.2	10.9	18.7	14.7	22.5	17		10	9	8	9	15.5	19	21.5	20.2	11.1	17.46		10	9	10	9.66667
January	cold	5	6	5	5.33333		5	7	6	6		8	6.5	8	7.5	20.7	21.2	20.2	19.5	16.5	19.62		10	8	9	9	22.8	24.3	16.9	23.1	8.9	19.2		9	11	10	10	25.9	17.6	23	23.8	21.6	22.38		11	10	11	10.6667
Kintyre	cold	5	6	5	5.33333		6	6	6	6		7.5	7	7	7.16667	20.6	22.8	16.2	14.2	16.4	18.04		8	9	9	8.66667	10	26.4	15.7	15.1	10.5	15.54		11	10	11	10.6667	25.5	18.9	19.8	28.2	27.1	23.9		11	12	13	12
LP0035	cold	4.5	4	4.5	4.33333		5	6	6	5.66667		7	7	6.5	6.83333	15.3	14	11.9	22.5	23.8	17.5		8	8	9	8.33333	8.8	22.2	13.9	10.9	20.2	15.2		9	11	10	10	27.6	17.9	22.1	25.7	19.8	22.62		11	12	10	11
LP0055(AROTIS)	cold	6	5	5.5	5.5		6	7	7	6.66667		8	8	9	8.33333	16.2	20.5	16.7	21.7	27.6	20.54		9	9	10	9.33333	25.6	6.3	7.3	28.8	4.3	14.46		10	11	10	10.3333	39.1	11.8	32.3	10.1	23.9	23.44		10	12	11	11
LP0075	cold	5.5	5	5	5.16667		6	6	6.5	6.16667		7.5	7	8	7.5	19.2	11.5	10.2	8.4	24.2	14.7		9	8	8	8.33333	14.1	6.9	11.2	10.7	7.3	10.04		10	10	9	9.66667	8.7	12.4	13.1	12.5	10	11.34		11	12	10	11
LP0105	cold	5	5.5	5.5	5.33333		6	7	6	6.33333		7	8	8	7.66667	18.1	18.4	19.5	22.4	16	18.88		9	9	8	8.66667	30.2	32.8	30.4	26.9	13.4	26.74		11	10	10	10.3333	21.9	17.5	24.5	12.3	24.5	20.14		11	11	10	10.6667
LP0425	cold	4.5	5	4.5	4.66667		5	6	5.5	5.5		7	6.5	6	6.5	9.5	19.9	11.2	15.4	12	13.6		7	7	8	7.33333	18.2	17.1	18.8	18.3	12.3	16.94		9	9	11	9.66667	10.3	15.5	9.3	10.6	24.8	14.1		10	9	12	10.3333
LP0515	cold	5	4.5	5.5	5		5	6	6	5.66667		7	7	7	7	19.4	18.7	16.7	15.9	18	17.74		8	8	8	8	10.6	5.6	6.8	12.5	15.8	10.26		8	8	9	8.33333	12.1	12.7	11.4	18	16.5	14.14		9	9	9	9
LP1005	cold	5.5	5	6	5.5		7	6	7	6.66667		7	9	7	7.66667	15.1	13.2	14.3	25.1	19.5	17.44		10	10	7	9	19.5	4.1	12.1	7.1	48	18.16		10	9	8	9	32.4	16.7	25.2	15.7	29.9	23.98		10	10	9	9.66667
LP9155(CANIS)	cold	5	4.5	5	4.83333		6	6	6	6		8	6	8	7.33333	8.2	17.3	12.3	14.5	16.8	13.82		10	9	10	9.66667	17.5	27.4	13.1	22.1	4.4	16.9		10	12	11	11	14.7	13.5	39.1	18.3	17.2	20.56		10	12	11	11
LP9435(ARUGA)	cold	5	6	6	5.66667		7	6	6	6.33333		8.5	8	8	8.16667	10.6	9	9.7	14.5	11.8	11.12		10	9	9	9.33333	22.1	18.4	22.9	25.1	14.8	20.66		10	11	11	10.6667	14.6	11.9	33.5	19.6	22.8	20.48		10	11	11	10.6667
LP9535	cold	5	4.5	5	4.83333		6	5	6	5.66667		7	7	7	7	8.9	15.5	12.2	11.4	13.4	12.28		8	8	9	8.33333	13.4	18.4	23.9	12.1	14.4	16.44		11	9	10	10	28.3	15.8	10.3	35.5	36.1	25.2		11	10	12	11
Magician	cold	6	5.5	5	5.5		7	7	7	7		8	8	8	8	15.4	17.8	9.4	21.1	15.8	15.9		9	9	8	8.66667	25.7	20.4	22.7	16.9	17.7	20.68		11	11	9	10.3333	12.4	15.1	25.7	20.9	30.9	21		11	12	11	11.3333
Majestic	cold	5.5	4.5	6	5.33333		5.5	6	5	5.5		7	7	7	7	16.8	11.3	14.3	13.3	12.2	13.58		9	8	8	8.33333	14	3.6	15.2	20.7	19.8	14.66		10	11	10	10.3333	23.1	13.4	14.7	17.1	21.4	17.94		11	12	10	11
Millenium	cold	5	4.5	5.5	5		7	7	6	6.66667		7	8	8	7.66667	11.8	9	14.2	13.1	8.6	11.34		9	9	8	8.66667	14.5	11.2	12.2	14	14	13.18		10	11	10	10.3333	20.6	24.4	23.9	16.3	21.1	21.26		11	12	12	11.6667
Picadilly	cold	5.5	5	4.5	5		6	6	6	6		7	8	8	7.66667	31.5	29.8	11.2	17.2	24.1	22.76		8	8	9	8.33333	35.1	15.8	15.9	13.6	12.6	18.6		10	11	9	10	12.1	11.2	21.7	17.3	13.5	15.16		11	12	10	11
Premium	cold	6	6	6	6		7	7	8	7.33333		8	7.5	7	7.5	30.6	23.4	25.6	21.6	33.7	26.98		10	10	9	9.66667	15.9	29.4	12.7	26.1	10.8	18.98		9	10	9	9.33333	25.5	17.2	13.2	24.9	21.3	20.42		12	13	11	12
RHZ110123Ottoberg	cold	5	5.5	6	5.5		6	6	6	6		8	7.5	8	7.83333	16.4	27.6	29.7	19.2	18.9	22.36		9	10	10	9.66667	27.8	29.6	18.6	23.2	39.7	27.78		10	11	11	10.6667	19	24.5	38.3	12.2	9.3	20.66		10	11	11	10.6667
RHZ110124MmliswilPasswang	cold	5	5.5	5	5.16667		6	7	6.5	6.5		7.5	7	7.5	7.33333	11.9	10.2	17.4	16.5	8	12.8		9	9	8	8.66667	8.7	9	20.5	12.3	10.8	12.26		11	10	10	10.3333	30.8	18.4	22.1	15.6	15.6	20.5		11	12	10	11
RHZ110125Wildberg	cold	5	4.5	5	4.83333		7	5.5	7	6.5		8	6	7.5	7.16667	16	10.3	16.5	12.4	11.3	13.3		9	9	7	8.33333	6.1	11.4	26.4	15	18.6	15.5		11	12	9	10.6667	25.8	30.8	24.8	15.3	45	28.34		12	11	12	11.6667
RHZ110127BtschwilZwiselen	cold	5	5	5	5		7	5.5	6	6.16667		6	6.5	7	6.5	24.5	13.5	15.5	22.9	19.6	19.2		8	9	8	8.33333	16.3	15.8	15.4	16	17.3	16.16		9	10	8	9	31.9	14.5	22.4	19.6	27.1	23.1		10	10	10	10
Rodrigo	cold	5.5	5	5	5.16667		8	7	5.5	6.83333		8	8	6	7.33333	37	30.3	29.6	29.3	30.3	31.3		10	9	9	9.33333	26.2	16.4	23.8	34.6	6.8	21.56		11	10	11	10.6667	15.2	14.8	9.3	10	11.9	12.24		11	12	12	11.6667
Rosetta	cold	5	5.5	5	5.16667		6	5	6	5.66667		7	5	6.5	6.16667	16.4	16.1	14.1	15.9	12.8	15.06		8	8	8	8	16.3	2.9	18.5	22.7	23.9	16.86		10	10	9	9.66667	10.2	10.5	9.1	13.8	11.6	11.04		10	12	12	11.3333
Solomon	cold	5	5.5	5.5	5.33333		6	6	6	6		7	8	8.5	7.83333	15.5	25.4	13.3	18.3	16.7	17.84		9	9	9	9	33.1	11.4	13.2	28	11.3	19.4		12	10	10	10.6667	17.8	26.8	24.7	26.5	23.1	23.78		12	12	11	11.6667
Soriento	cold	5	5	5.5	5.16667		5	7	6	6		8	8	6	7.33333	26.5	21.9	22.9	23.5	17.6	22.48		9	8	9	8.66667	25.6	17.7	10.2	8.1	15	15.32		11	9	10	10	17.2	22.8	24.6	22.4	30.7	23.54		10	11	12	11
Stefani	cold	5	4.5	5.5	5		6.5	7	6.5	6.66667		7	7	8	7.33333	9	31.7	11.6	31.5	23.8	21.52		9	9	8	8.66667	26.6	12.1	17.2	10.1	37.3	20.66		9	10	9	9.33333	29.2	14.7	14.9	10.7	24.6	18.82		11	9	12	10.6667
Twymax	cold	5.5	6	5.5	5.66667		6	6.5	7	6.5		7.5	8	8	7.83333	25.1	29.5	23.6	15.2	19.6	22.6		10	10	9	9.66667	22.4	29.8	21.9	18.6	26.1	23.76		11	12	12	11.6667	33	34.5	26.5	22.1	37.8	30.78		13	11	12	12
AberAvon	control	9	8	10	9		12	11	14	12.3333		17	16	13	15.3333	26.2	26.3	21	23.8	20.4	23.54		16	14	17	15.6667	16.4	26.7	16.8	24.7	21.3	21.18		15	17	14	15.3333	29.2	23.2	28.7	17	30.6	25.74		15	14	18	15.6667
AberChoice	control	9	6	8	7.66667		10	11	9	10		11	10	6	9	15	24.7	23.8	22.9	21.3	21.54		12	11	11	11.3333	26.6	24.2	15.9	20.7	18.8	21.24		11	12	14	12.3333	9.2	23.2	17.8	14.2	15.8	16.04		18	11	14	14.3333
AberClyde	control	7	11	9	9		10	12	12	11.3333		15	14	14	14.3333	27.8	23	20.7	31.6	32.8	27.18		18	16	15	16.3333	23.8	20.7	15.4	16.6	11	17.5		16	17	17	16.6667	16.7	16.8	44	22.4	29.4	25.86		16	17	16	16.3333
AberDart	control	11	8	8	9		9	8	12	9.66667		13	10	15	12.6667								13	11	12	12	19.2	8.2	10.1	28.6	22.5	17.72		16	15	12	14.3333	25.7	33.9	13.1	30.7	25.3	25.74		14	17	15	15.3333
AberGain	control	10	8	7	8.33333		11	10	9	10		12	13	12	12.3333	16.5	24.8	12.3	26	16.3	19.18		14	14	14	14	12.8	12.2	23.3	30.2	11.1	17.92		16	16	15	15.6667	25.8	16.5	26.4	27.4	46	28.42		19	18	17	18
AberGreen	control	10.5	7.5	9	9		9	11	8	9.33333		12	12	16	13.3333	30	12.5	31.5	19.9	13.6	21.5		16	13	13	14	11.2	18.9	17.9	14.8	22.7	17.1		14	15	15	14.6667	16.4	15.8	36.7	23.7	19.2	22.36		18	19	15	17.3333
AberZeus	control	8	8	7	7.66667		8	10	10	9.33333		13	12	11	12	24	17.1	17.1	22.5	19.7	20.08		13	13	13	13	13.5	11.5	10.2	21.2	15.6	14.4		14	15	15	14.6667	23.8	11.9	35.2	19.3	11.2	20.28		14	15	15	14.6667
ARARA	control	10	6	7	7.66667		10	9	11	10		10	10	14	11.3333	24.5	21.2	15.5	21.2	16.4	19.76		14	12	12	12.6667	14.2	20.8	21.9	14.4	14.8	17.22		16	15	15	15.3333	19.4	26.3	29.3	24.8	13.4	22.64		18	20	17	18.3333
AROLUS	control	9	8	8	8.33333		9	11	11	10.3333		12	11	14	12.3333	16.3	13.3	22.5	27.7	12.9	18.54		14	14	15	14.3333	12.1	18.9	15.1	19.5	25.6	18.24		15	13	14	14	20.5	30.5	15.4	21.3	11.2	19.78		16	16	15	15.6667
Astonenergy	control	10	8	9	9		9.5	12.5	11	11		11	12	15	12.6667	23.1	22.2	24.5	12.3	17.4	19.9		13	13	13	13	17	13.6	18.5	18.1	17.2	16.88		15	13	17	15	14.2	27	39	23.9	26.6	26.14		17	19	20	18.6667
Ba14088	control	10	9	9	9.33333		11	11	12	11.3333		14	13	13	13.3333	15.3	19.4	15.9	19.6	11.6	16.36		13	13	14	13.3333	8.2	6	3.9	11.2	12.8	8.42		14	14	13	13.6667	21.4	24.8	19.4	23.9	14.1	20.72		14	14	13	13.6667
Ba14125	control	9	10	8.5	9.16667		10	13	9	10.6667		13	13	17	14.3333	24.6	17.2	14.9	26.7	19.9	20.66		15	19	14	16	11.4	26.6	19.3	16.7	23.8	19.56		17	23	17	19	27.7	21	17.6	25	19.3	22.12		20	20	18	19.3333
Ba14155	control	10	8	9.5	9.16667		10	12	10	10.6667		10	11	13	11.3333	16.5	25	16	25.7	18.3	20.3		12	12	11	11.6667	25.1	5.5	19.4	24.8	25.8	20.12		14	13	14	13.6667	19.9	11.4	19.6	28.1	26.3	21.06		16	15	14	15
BAR01	control	8	9	9	8.66667		10	13	10	11		11	16	11	12.6667	31.3	17.5	16.7	21	21.9	21.68		13	13	12	12.6667	24	8	22.9	7.3	8.1	14.06		17	15	13	15	17.4	22.5	31.9	15.2	23.2	22.04		17	14	14	15
BAR02	control	10	9	11	10		12	10	10	10.6667		12	11	13	12	22.5	25.5	31.8	14.2	20.4	22.88		15	13	14	14	11.6	12	28.9	26.4	20.4	19.86		16	14	14	14.6667	18.7	32.6	30.6	28.8	28.5	27.84		16	14	15	15
BAR03	control	7	11	9	9		6	13	9	9.33333		12	10	13	11.6667	19.6	20.5	29.1	22.3	29.3	24.16		14	13	11	12.6667	11.2	29.8	20.6	18.9	5.2	17.14		14	15	13	14	16.5	40.2	20.5	17.9	16.5	22.32		14	15	14	14.3333
BAR04	control	10	9	7	8.66667		12	10	10	10.6667		13	14	13	13.3333	15.7	19.6	20.6	26.4	18.7	20.2		14	16	14	14.6667	18.6	35.1	16.9	9.4	6.8	17.36		15	16	16	15.6667	24.3	13.2	20.5	16.6	22.8	19.48		14	17	18	16.3333
BAR05	control	10	8.5	8	8.83333		8	10	10	9.33333		11	12	11	11.3333	29.3	18	27.1	19.5	17.6	22.3		13	10	12	11.6667	5.3	7.3	8.3	9.1	14.1	8.82		12	13	12	12.3333	21.8	27.2	11.1	18.2	19.8	19.62		13	13	12	12.6667
BAR06	control	8	9	11	9.33333		10	11	14	11.6667		13	14	14	13.6667	20.1	19.2	20.1	27.6	23.6	22.12		14	14	14	14	22.6	17.8	14.9	15	12.4	16.54		15	15	16	15.3333	26.1	19.4	22.6	20.8	26.1	23		14	14	15	14.3333
BAR07	control	10	7	8	8.33333		8	6	10	8		12	13	11	12	25.6	20.4	28.2	28.1	21.8	24.82		13	12	12	12.3333	24.8	16.8	8.5	28.8	8.4	17.46		13	13	13	13	34.1	29.4	22.8	34.4	15.6	27.26		14	13	11	12.6667
BAR08	control	9	10	9	9.33333		10	11	10	10.3333		11	12	14	12.3333	19.9	25.5	22.1	17.3	29.4	22.84		13	10	12	11.6667	15.1	10.5	15.7	32.8	22.9	19.4		14	12	15	13.6667	30.8	25.3	27.6	26.1	15.8	25.12		13	12	14	13
BAR09	control	10	8	6	8		11	10	8	9.66667		12	13	7	10.6667	19.3	14.3	17.1	22.1	17.1	17.98		13	13	13	13	13	6	13	12.3	11.4	11.14		14	17	10	13.6667	17.7	20.5	13.1	26.6	23.2	20.22		16	16	11	14.3333
BAR10	control	11	6	9	8.66667		7	11	8	8.66667		8	11	7	8.66667	10.5	23.9	18.9	23.4	15.1	18.36		15	15	12	14	8.1	17.3	13.3	5	19.2	12.58		14	17	12	14.3333	14.8	26.9	13.8	16.4	23.7	19.12		18	18	15	17
Cancan	control	7	9	8	8		10	10	10	10		12	10	10	10.6667	12.2	15	25.4	10	17.3	15.98		13	13	12	12.6667	17.8	8.8	5.4	8.2	12.1	10.46		12	14	15	13.6667	24.1	27.5	14.1	25.7	22.4	22.76		15	15	14	14.6667
Carraig	control	9	8	7	8		12	10	9	10.3333		9	13	12	11.3333	30.1	24.3	27.8	26	15.9	24.82		11	13	14	12.6667	16.6	23.2	25.3	16.2	16.1	19.48		17	13	17	15.6667	20.8	24.3	40.9	28.7	18.4	26.62		16	14	15	15
Cashel	control	9	10	9	9.33333		11	12	12	11.6667		14	14	13	13.6667	22.9	22.1	19.7	29.5	28.6	24.56		12	14	14	13.3333	7.9	2.2	8.8	8	10.1	7.4		16	13	15	14.6667	14.2	42.3	20.6	29	12.8	23.78		16	14	16	15.3333
Denver	control	8	10	8	8.66667		11	9	10	10		12	10	11	11	18	26.7	30.5	25.9	20	24.22		12	13	11	12	26.5	24.7	42.1	18.2	29	28.1		16	15	14	15	27.1	36.4	22	20.1	30.4	27.2		16	15	14	15
Giant	control	7.5	8	9	8.16667		14	13	11	12.6667		15	14	13	14	28.8	29.1	18.2	25.4	21.4	24.58		15	14	14	14.3333	14.6	7.9	19.2	17.1	17.4	15.24		17	16	17	16.6667	36.1	29.1	25.2	29.9	42.8	32.62		16	15	16	15.6667
Glencar	control	9	8	8	8.33333		11	9	10	10		14	12	12	12.6667	33.6	28.3	30.7	35.6	29	31.44		12	13	14	13	7.5	5.6	24.6	28	12.1	15.56		15	16	14	15	26.9	21.1	28.7	31.8	36.6	29.02		16	20	16	17.3333
Glenveagh	control	8	10	8	8.66667		11	8	10	9.66667		12	13	11	12	28.6	13.4	27	17.5	25.1	22.32		13	12	13	12.6667	5.9	17.3	8.9	9.9	15.7	11.54		13	13	14	13.3333	19.3	27.9	32.6	31.3	29.7	28.16		13	13	14	13.3333
January	control	6	7	8	7		12	10	12	11.3333		9	13	14	12	18.8	16.5	17.9	16.9	18.8	17.78		13	14	14	13.6667	35.9	13.6	14.5	28.1	21.2	22.66		16	15	14	15	17.4	21.9	12.3	40.8	20.4	22.56		15	16	16	15.6667
Kintyre	control	8	9	7	8		9	10	10	9.66667		12	11	11	11.3333	15.7	22	33.9	25.4	19.2	23.24		13	14	13	13.3333	16.3	21	28.8	10.4	11.6	17.62		14	16	17	15.6667	27.4	39.3	12.4	16.4	11	21.3		16	15	16	15.6667
LP0035	control	9	11	10	10		12	11	12	11.6667		12	14	15	13.6667	21.1	28.3	22.4	41	25.1	27.58		13	12	13	12.6667	8.3	24.8	33.6	23	36.8	25.3		14	14	13	13.6667	25.2	30.3	21.6	37	19.1	26.64		15	14	14	14.3333
LP0055(AROTIS)	control	8	7.5	8	7.83333		9	9	10	9.33333		12	11	12	11.6667	18.1	20.5	21.2	17.1	21.6	19.7		11	12	13	12	10.6	14.9	13.9	6.7	7.3	10.68		14	14	13	13.6667	20.1	14.8	20.5	20.2	21.2	19.36		15	14	15	14.6667
LP0075	control	9	7	7	7.66667		12	9	9	10		13	10	11	11.3333	29.2	21	24.7	14	15.9	20.96		12	14	15	13.6667	9.4	13.3	15.1	13.3	11.4	12.5		12	16	15	14.3333	21.2	23.9	14.1	17.9	21.8	19.78		17	13	17	15.6667
LP0105	control	8	8	7	7.66667		10	8	9	9		12	13	13	12.6667	25.4	28.2	18	17.9	25.4	22.98		12	13	13	12.6667	12.7	17.3	17.1	25.1	14.1	17.26		13	14	13	13.3333	22.1	20.2	10.1	16.7	14.7	16.76		16	16	14	15.3333
LP0425	control	10	9	7.5	8.83333		10	9	11	10		14	13	12	13	27.1	24.1	18.4	20.8	22.6	22.6		14	13	12	13	29.9	27.9	15.3	20.8	21.6	23.1		15	14	14	14.3333	18.9	22.9	21	28.7	28	23.9		17	16	17	16.6667
LP0515	control	8	7	10	8.33333		9	10	11	10		10	10	11	10.3333	20.1	29.5	18.2	24.4	14.6	21.36		14	13	12	13	20.1	19.7	12.5	6.5	11.1	13.98		16	14	14	14.6667	12.6	23.9	30.7	20.3	30	23.5		19	19	16	18
LP1005	control	9	6	10	8.33333		11	7	11	9.66667		9	14	13	12	15	29.6	19.5	20.9	26.4	22.28		13	14	14	13.6667	8.7	24.9	20.4	17.7	9.5	16.24		15	16	16	15.6667	9.8	16	28.1	13.5	25.5	18.58		19	20	16	18.3333
LP9155(CANIS)	control	8	7	8	7.66667		12	9	8	9.66667		10	10	13	11	12.2	16.1	25.7	19.2	16.7	17.98		10	12	12	11.3333	13.1	2.7	7.5	16.5	11.1	10.18		15	14	12	13.6667	13.5	36.4	29.3	25.8	25.8	26.16		17	16	15	16
LP9435(ARUGA)	control	10	9	9	9.33333		13	12	13	12.6667		13	14	14	13.6667	24.9	21.1	26.3	25.5	23.5	24.26		14	13	15	14	27.8	26.6	30.6	14.4	10.9	22.06		14	14	15	14.3333	27	26.9	27	17.2	31.7	25.96		13	14	15	14
LP9535	control	9	8	10	9		11	9	10	10		14	11	13	12.6667	24.3	21.9	21.1	16.1	17.5	20.18		14	14	15	14.3333	7.2	11.1	8.7	12.4	16.2	11.12		14	15	16	15	23.5	18.4	28.6	17.6	21.1	21.84		15	15	16	15.3333
Magician	control	11.5	10	8	9.83333		10	10	14	11.3333		13	14	16	14.3333	19.4	25.2	24	22.3	18.5	21.88		15	13	18	15.3333	22.2	15.2	20.9	18.7	20.4	19.48		16	15	16	15.6667	25.4	42.5	27.5	30.2	22.9	29.7		16	18	20	18
Majestic	control	11	8	9	9.33333		10	11	12	11		14	13	14	13.6667	23.3	24.7	21	27.5	13.4	21.98		15	14	14	14.3333	13	18.8	21	16.6	20.8	18.04		13	14	14	13.6667	35.1	11.4	31.6	43.5	33.8	31.08		16	15	15	15.3333
Millenium	control	10	9	9	9.33333		11	9	10	10		12	12	15	13	26.2	47.9	37.2	27	44.3	36.52		14	16	14	14.6667	17.8	8.9	21.9	24.8	22.1	19.1		15	16	14	15	20.1	39.6	45.5	48	27.5	36.14		16	19	17	17.3333
Picadilly	control	10	8.5	9	9.16667		12	10	11	11		13	12	12	12.3333	23.9	19.3	23.1	26.5	34	25.36		12	13	14	13	9.3	10.7	21.6	22.3	14.9	15.76		13	14	14	13.6667	38.9	29.5	26.5	20.9	14.6	26.08		15	14	14	14.3333
Premium	control	8	11	10	9.66667		14	12	14	13.3333		13	14	16	14.3333	24.5	24.1	26.9	25.2	23.5	24.84		14	16	15	15	32	30.4	12.6	21.1	17.5	22.72		16	17	15	16	34.8	31	28.3	36.6	37.1	33.56		18	19	17	18
RHZ110123Ottoberg	control	12	11	10	11		13	14	17	14.6667		14	14	18	15.3333	30	28.1	18.1	14.3	28.8	23.86		14	15	18	15.6667	27.8	17.8	10.1	11.9	11.2	15.76		16	16	15	15.6667	33.5	26.1	21.5	32.1	33.5	29.34		16	17	17	16.6667
RHZ110124MmliswilPasswang	control	9	9	7	8.33333		11	11	9	10.3333					#DIV/0!	26.7	22	20.3	17.3	26.1	22.48		13	13	14	13.3333	24.2	36.9	25.1	14.2	16.4	23.36		14	14	14	14	31.2	34	38.6	27.1	29.1	32		14	14	14	14
RHZ110125Wildberg	control	10	8	9	9		11	10	10	10.3333		13	14	13	13.3333	20.6	19.7	15.4	21.3	25.9	20.58		13	13	13	13	28.8	26.9	13	19.8	28.5	23.4		16	14	15	15	30.3	24	19.2	25.6	23.9	24.6		15	15	19	16.3333
RHZ110127BtschwilZwiselen	control	10	11	9	10		10	10	12	10.6667		12	14	13	13	26.1	33	19	28.9	21.4	25.68		13	14	15	14	12.3	8.4	9.6	26.1	14.1	14.1		13	16	15	14.6667	29.5	24.1	30.6	15.8	34	26.8		14	16	15	15
Rodrigo	control	10	9	9	9.33333		10	9	11	10		10	11	14	11.6667	18.2	12.6	25.2	25.1	16.6	19.54		15	12	14	13.6667	21.9	20.8	15.5	18.6	10.5	17.46		17	17	14	16	26.8	25.3	16.2	27.1	12.9	21.66		16	17	14	15.6667
Rosetta	control	8	5	7	6.66667		7	10	9	8.66667		12	12	10	11.3333	13.3	15.6	13.1	14.3	20.1	15.28		13	14	13	13.3333	3.1	9.8	1.8	10.5	2.8	5.6		12	13	13	12.6667	23.8	37.2	11.6	22.3	12.5	21.48		14	17	14	15
Solomon	control	8	8	7	7.66667		10	10	10	10		13	11	12	12	19.6	23.4	16.4	24.9	20.4	20.94		13	13	14	13.3333	19.2	16	19.8	10.6	18	16.72		13	14	13	13.3333	42.5	17	32.3	14.5	26.7	26.6		15	14	16	15
Soriento	control	10.5	9	8.5	9.33333		10	11	11	10.6667		11	14	12	12.3333	26.6	25.8	25.5	20.4	17.6	23.18		12	12	12	12	13.2	21.6	7.4	11.4	18.2	14.36		14	14	13	13.6667	20.9	20.1	13.3	28.1	21.8	20.84		16	15	15	15.3333
Stefani	control	10	7	8	8.33333		10	12	9	10.3333		12	13	13	12.6667	21.5	20.3	27.3	30.5	31.9	26.3		13	14	15	14	21.4	15	18.7	12.1	28.8	19.2		16	15	14	15	22.1	40.4	27.8	33.3	23.5	29.42		16	15	16	15.6667
Twymax	control	7	8	8	7.66667		11	11	9	10.3333		13	12	11	12	19.1	23.6	20.1	23.9	14.1	20.16		13	15	15	14.3333	17.4	9.2	26.8	26.1	11.6	18.22		16	15	15	15.3333	30.2	33.6	18.4	26.2	24.9	26.66		18	16	17	17
[truncated: 49 more columns]

## Sheet: exp 2
accession	treatment	height 16.2.2016	height 16.2.2016	height 16.2.2016	average height 16.2.2016		height 23.2.2016	height 23.2.2016	height 23.2.2016	average height 23.2.2016		height 1.3.2016	height 1.3.2016	height 1.3.2016	average height 1.3.2016		height 8.3.2016	height 8.3.2016	height 8.3.2016	avergae height 8.3.2016	SPAD 8.3.2016	SPAD 8.3.2016	SPAD 8.3.2016	SPAD 8.3.2016	SPAD 8.3.2016	average SPAD 8.3.2016		height 15.3.2016	height 15.3.2016	height 15.3.2016	average height 15.3.2016	SPAD 15.3.2016	SPAD 15.3.2016	SPAD 15.3.2016	SPAD 15.3.2016	SPAD 15.3.2016	averge SPAD 15.3.2016		height 22.3.2016	height 22.3.2016	height 22.3.2016	average height 22.3.2016	SPAD 22.3.2016	SPAD 22.3.2016	SPAD 22.3.2016	SPAD 22.3.2016	SPAD 22.3.2016	average SPAD 22.3.2016
		measurement 1	measurement 2	measurement 3			measurement 1	measurement 2	measurement 3			measurement 1	measurement 2	measurement 3			measurement 1	measurement 2	measurement 3		measurement 1	measurement 2	measurement 3	measurement 4	measurement 5			measurement 1	measurement 2	measurement 3		measurement 1	measurement 2	measurement 3	measurement 4	measurement 5			measurement 1	measurement 2	measurement 3		measurement 1	measurement 2	measurement 3	measurement 4	measurement 5
AberAvon	cold	6	5	6	5.66667		8	7	7	7.33333		9	10	9	9.33333		11	12	11	11.3333	13.3	17.6	20.5	15.9	16.3	16.72		13	12	12	12.3333	21.1	29.5	20.9	19.3	22.8	22.72		10	9	9	9.33333	13.2	20.3	20.7	15.7	16.1	17.2
AberChoice	cold	5	6	6	5.66667		8	8	7	7.66667		9	10	10	9.66667		11	12	12	11.6667	19.8	22	20.6			20.8		12	14	13	13	23.8	23.6	16.7	35.8	33.3	26.64		12	11	11	11.3333	29.5	22.9	20.8	36.1	25.2	26.9
AberClyde	cold	6	6	6	6		7	8	8	7.66667		10	10	10	10		11	12	12	11.6667	28.1	40.7	24.3	33.7	27.9	30.94		14	14	13	13.6667	48.2	35.2	26.5	36.2	43.6	37.94		12	11	12	11.6667	27.8	30.8	33	21.4	16.2	25.84
AberDart	cold	6	6	6	6		8	8	8	8		9	9	10	9.33333		13	12	12	12.3333	17.2	31.7	20.4	24.1	19.2	22.52		13	14	14	13.6667	19.3	26.7	26.1	25.1	35.5	26.54		12	11	11	11.3333	34.9	26.9	17.5	19.3	25.3	24.78
AberGain	cold	6	6	5	5.66667		8	7	7	7.33333		8	11	10	9.66667		10	12	12	11.3333	18	18.8	25			20.6		15	13	15	14.3333	20.1	21.3	29.3	23.7	18	22.48		14	12	10	12	27.4	25.8	36	19.5	18.8	25.5
AberGreen	cold	5	6	6	5.66667		8	8	8	8		10	9	9	9.33333		12	12	11	11.6667	21.2	17.4	22.3			20.3		13	14	13	13.3333	19.2	20.5	31.7	22.8	30.1	24.86		13	12	11	12	17.8	33.1	30.5	18.1	13.7	22.64
AberZeus	cold	5	5	5	5		7	8	7	7.33333		10	9	9	9.33333		11	10	11	10.6667	20.5	14.7	21.1			18.7667		12	12	12	12	19.6	20.4	18.4	17.7	22	19.62		9	9	10	9.33333	18.6	17.8	18.2	17.6	14.9	17.42
ARARA	cold	6	6	6	6		9	8	8	8.33333		10	11	10	10.3333		12	13	12	12.3333	19.6	22.9	30.9	21	34.6	25.8		13	14	14	13.6667	16.3	17.5	22.1	26.5	21.8	20.84		11	11	12	11.3333	15.4	21.7	24.7	20.7	15.2	19.54
AROLUS	cold	6	5	6	5.66667		8	7	9	8		10	10	9	9.66667		11	12	12	11.6667	19.9	21.1	21.3	22.9	25.6	22.16		13	14	13	13.3333	24.2	23	26.2	23.9	34.4	26.34		13	11	11	11.6667	29.8	20.5	24.9	17.1	29.5	24.36
Astonenergy	cold	5	6	6	5.66667		8	9	9	8.66667		9	8	9	8.66667		13	12	12	12.3333	20.7	25.6	21.3	24.9	19.6	22.42		14	15	14	14.3333	20.5	23.5	22.2	26.7	28.5	24.28		13	11	12	12	27	29.7	35.5	28.5	19.7	28.08
Ba14088	cold	5	5	5	5		7	8	7	7.33333		7	8	8	7.66667		11	10	11	10.6667						/////		13	12	12	12.3333	18.5	14.9	17.1	15.6	14.4	16.1		9	7	8	8	12.6	10.7	9.9	11.5	22	13.34
Ba14125	cold	5	6	5	5.33333		6	7	8	7		8	8	10	8.66667		10	11	9	10						/////		12	13	11	12	31.7	26.3	31.2	27.5	33.5	30.04		10	7	9	8.66667	17.9	11.8	27.9	20.1	13.4	18.22
Ba14155	cold	6	6	6	6		8	8	8	8		9	10	10	9.66667		12	12	12	12	21.6	21.4	23.2	24.1	20.6	22.18		14	14	13	13.6667	37.1	34	33.2	16	17.8	27.62		11	9	9	9.66667	9.7	8.4	13	15.1	31.3	15.5
BAR01	cold	6	5	6	5.66667		7	7	8	7.33333		8	9	9	8.66667		10	11	10	10.3333	14.9	19.1	22	12.2	18.4	17.32		12	12	12	12	26.7	29.2	21.1	17	24.2	23.64		11	8	10	9.66667	25.7	18.4	23	23.3	14	20.88
BAR02	cold	5	6	6	5.66667		7	7	7	7		8	9	9	8.66667		10	10	9	9.66667	15.1	17	19.4			17.1667		12	11	11	11.3333	21.1	24.4	19.3	25.5	20.3	22.12		11	10	9	10	21.5	31.1	17.9	18.4	18	21.38
BAR03	cold	5	6	5	5.33333		7	7	7	7		8	8	9	8.33333		10	10	9	9.66667	22.1	18.4	17.1	22.1	18.4	19.62		13	12	11	12	20.8	23.4	24.6	22.3	21.3	22.48		9	9	9	9	12.6	23.5	19.6	23.5	25.7	20.98
BAR04	cold	5	6	5	5.33333		7	7	7	7		8	8	8	8		10	10	10	10	17.2	14.7	23.2	15.6	16	17.34		12	12	11	11.6667	24.2	17.6	23.2	19	17.5	20.3		9	9	9	9	20.3	22.6	15.8	16.7	19.2	18.92
BAR05	cold	6	6	5	5.66667		8	7	7	7.33333		7	8	8	7.66667		9	10	10	9.66667	30.4	42.5	27.5	26.1	29.7	31.24		12	12	11	11.6667	32.8	29.6	25.5	27.2	18.5	26.72		9	8	8	8.33333	17.2	15.6	20.6	30.1	31.2	22.94
BAR06	cold	5	5	6	5.33333		7	7	7	7		8	9	8	8.33333		11	10	10	10.3333	20.6	22.5	28.3			23.8		13	13	13	13	23.4	24.2	29.4	30.4	28	27.08		13	9	10	10.6667	34.2	30.4	27.2	31.4	15.4	27.72
BAR07	cold	6	5	5	5.33333		7	7	7	7		9	8	8	8.33333		10	10	10	10	26.3	18.2	19.6			21.3667		11	12	11	11.3333	20.6	22.6	23.1	32.9	27.9	25.42		11	11	9	10.3333	17.3	17.6	16.4	13.9	17.2	16.48
BAR08	cold	6	6	6	6		7	7	8	7.33333		9	9	9	9		10	10	10	10	20.9	17	17.2			18.3667		12	11	12	11.6667	21.6	21.2	20.6	25.6	33.5	24.5		10	10	10	10	14.5	19.9	17.9	17.8	22.7	18.56
BAR09	cold	6	6	7	6.33333		8	8	8	8		10	11	11	10.6667		13	13	13	13	15.3	19.8	17.3	26.3		19.675		15	16	15	15.3333	31.7	36.1	38.7	21.3	18.6	29.28		15	14	15	14.6667	39.1	34.7	20.7	17.9	28.4	28.16
BAR10	cold	6	6	6	6		8	8	9	8.33333		10	10	10	10		12	13	13	12.6667	15.7	21.7	15.1			17.5		15	15	14	14.6667	22.9	30.2	20.5	20.8	20.9	23.06		11	12	12	11.6667	26.1	33.7	25.4	31.2	24	28.08
Cancan	cold	6	6	6	6		8	8	7	7.66667		8	9	8	8.33333		10	11	10	10.3333	13.7	19.8	21.5			18.3333		11	12	11	11.3333	24.1	27.3	33.3	20.1	25.5	26.06		9	9	8	8.66667	12	19.2	28.3	13.3	24.6	19.48
Carraig	cold	6	5	6	5.66667		8	7	8	7.66667		88	8	8	34.6667		12	11	11	11.3333	30.8	17.9	19.2	28.7	24.7	24.26		13	13	13	13	30.8	18.5	30.7	31	21.1	26.42		13	12	12	12.3333	21.2	23	22.5	28.3	19.1	22.82
Cashel	cold	5	5	6	5.33333		7	8	8	7.66667		9	9	9	9		10	10	10	10	13.2	21.1	20.9	19.5		24.9		12	12	13	12.3333	17.5	16.6	21.2	21.6	21.1	19.6		10	7	8	8.33333	19.6	19.1	23.4	18.9	19.8	20.16
Denver	cold	6	5	5	5.33333		6	7	7	6.66667		8	9	8	8.33333		9	11	10	10	26.4	28.1	22.7	26.7	19.5	24.68		11	11	13	11.6667	26.2	23.5	25.3	20.5	27.6	24.62		11	10	9	10	19.7	39	28.6	25.8	34.8	29.58
Giant	cold	6	6	6	6		8	8	8	8		9	8	10	9		11	11	10	10.6667	20.5	17.7	34.7	20.3	18.8	22.4		13	13	14	13.3333	32.1	25.8	20.7	34.2	32.3	29.02		9	11	11	10.3333	27.9	40.9	31.3	27.2	36.4	32.74
Glencar	cold	7	7	6	6.66667		9	9	9	9		10	9	9	9.33333		13	13	12	12.6667	30.5	54	26	31.5	28	34		14	15	16	15	32.4	33.3	35.5	40.4	35.4	35.4		14	13	12	13	35.2	27.3	12.9	23.4	21.3	24.02
Glenveagh	cold	6	6	6	6		7	7	7	7		9	10	10	9.66667		11	11	12	11.3333	14.2	35.3	16.9	26.9	10.3	20.72		12	13	12	12.3333	30.5	22.3	24.3	25.3	25	25.48		10	8	8	8.66667	22.2	24.3	17.3	30.2	24	23.6
January	cold	5	5	6	5.33333		7	7	8	7.33333		9	9	10	9.33333		10	12	10	10.6667	31.8	34.4	19.5	27.7	20.3	26.74		13	15	12	13.3333	25.8	33.2	27.2	24.3	29.1	27.92		11	10	10	10.3333	36.4	28.2	28.6	22.2	16.7	26.42
Kintyre	cold	6	6	6	6		8	8	8	8		10	9	10	9.66667		10	12	12	11.3333	33.6	19.9	36.8	19	30.2	27.9		13	13	14	13.3333	26.9	22.4	23.2	33.8	44.1	30.08		12	10	13	11.6667	33.8	27	20.1	17.9	18.9	23.54
LP0035	cold	5	7	6	6		8	9	8	8.33333		10	11	10	10.3333		11	13	11	11.6667	22.4	24.5	21.8	15.3	28.2	22.44		14	14	15	14.3333	24.1	19.4	18.1	23.4	21.3	21.26		12	11	10	11	18.4	22.8	17	20.1	23.9	20.44
LP0055(AROTIS)	cold	5	5	5	5		7	7	7	7		9	9	9	9		10	11	12	11	16.8	15.3	14.7	16.5	19.3	16.52		13	14	13	13.3333	28.6	33.7	26.5	34.6	28.9	30.46		7	9	8	8	26.7	26.7	37.2	17.7	18	25.26
LP0075	cold	6	6	6	6		8	7	8	7.66667		10	9	9	9.33333		12	12	12	12	18.1	17.2	18.6	19	16.6	17.9		14	14	14	14	28.1	20.2	21.1	20.5	18.4	21.66		12	11	11	11.3333	30.4	17	19.6	14.4	23.5	20.98
LP0105	cold	6	6	6	6		8	8	8	8		9	10	9	9.33333		12	12	13	12.3333	25.2	17.7	19.2	34.4	23.6	24.02		14	13	13	13.3333	24.6	23.9	22.9	32.2	34.9	27.7		13	11	11	11.6667	15.4	14.4	22.8	23.2	24.9	20.14
LP0425	cold	6	6	5	5.66667		8	9	8	8.33333		10	9	9	9.33333		13	13	11	12.3333	17.4	23.9	31.5			24.2667		15	14	15	14.6667	17.2	22.2	23.3	30.8	20.2	22.74		12	11	12	11.6667	24	19.2	18.7	16.1	23.1	20.22
LP0515	cold	6	6	5	5.66667		8	9	8	8.33333		9	9	9	9		11	12	12	11.6667	18.6	18.7	23.9	24	21.4	21.32		13	12	14	13	25.3	28.3	17.2	22.2	17.8	22.16		12	9	12	11	16.7	16.6	17.4	16.7	21.9	17.86
LP1005	cold	6	6	6	6		8	8	9	8.33333		9	10	9	9.33333		12	11	12	11.6667	17.1	31.3	15			21.1333		13	14	14	13.6667	14	13.4	20.1	22.3	22.2	18.4		11	10	11	10.6667	16.3	21.1	29.9	15.9	14	19.44
LP9155(CANIS)	cold	6	6	6	6		8	9	8	8.33333		9	10	10	9.66667		11	12	12	11.6667	24.2	19	23	17	17	20.04		13	13	14	13.3333	16.4	21.7	17.7	17.3	33.5	21.32		10	10	11	10.3333	16.6	17.5	25.7	24.5	16.5	20.16
LP9435(ARUGA)	cold	5	6	6	5.66667		8	9	8	8.33333		9	10	10	9.66667		11	13	12	12	15.6	16.1	14.6			15.4333		13	15	14	14	19.1	38.8	32.8	25.1	18	26.76		9	8	11	9.33333	25.3	22.5	16.6	27.8	22.3	22.9
LP9535	cold	6	6	6	6		8	8	9	8.33333		10	10	8	9.33333		12	11	12	11.6667	27.6	26.1	26.6	17.6	25.5	24.68		14	13	13	13.3333	27.7	19.6	21.1	28.9	37	26.86		13	10	10	11	20.5	31.8	24.6	20.1	27.5	24.9
Magician	cold	5	5	5	5		7	7	7	7		8	9	9	8.66667		10	10	11	10.3333	27.6	21.2	20.5	17.8	18.1	21.04		12	13	13	12.6667	20.8	20.5	21.5	19.5	17.6	19.98		10	10	8	9.33333	21.9	21.3	21.5	33.6	22	24.06
Majestic	cold	6	5	5	5.33333		7	7	7	7		9	10	9	9.33333		10	11	10	10.3333	24.5	15.8	18.8			19.7		12	12	13	12.3333	31	19.1	28.3	31.6	13.3	24.66		12	11	9	10.6667	25.2	16	29.3	16.9	17.2	20.92
Millenium	cold	6	5	5	5.33333		8	8	7	7.66667		9	10	9	9.33333		12	11	11	11.3333	29.6	25.4	31.6			28.8667		13	14	14	13.6667	34.9	21.4	22.7	25.7	29.6	26.86		12	13	13	12.6667	26.2	18.3	29.8	34.3	18.9	25.5
Picadilly	cold	5	5	5	5		7	7	7	7		9	9	8	8.66667		10	11	10	10.3333	21.6	18	22.4	23.5	20.9	21.28		13	12	14	13	24.2	23.7	26.8	26.7	31.9	26.66		10	10	11	10.3333	17.8	14.5	31.8	24.7	18.9	21.54
Premium	cold	7	6	6	6.33333		9	8	8	8.33333		8	10	9	9		12	12	13	12.3333	23.2	25.4	27.1	25.6	32.8	26.82		14	14	13	13.6667	21.8	16.7	27.8	15.2	32.1	22.72		10	10	8	9.33333	33.8	18.8	33.1	45.5	31.1	32.46
RHZ110123Ottoberg	cold	6	6	6	6		8	8	8	8		10	10	9	9.66667		12	12	12	12	34.8	19.6	22	31.3	31.4	27.82		14	13	14	13.6667	28.9	26.8	21.2	18.2	19.7	22.96		12	13	12	12.3333	22.4	17.7	16.4	24.8	18.4	19.94
RHZ110124MmliswilPasswang	cold	6	5	6	5.66667		8	8	8	8		10	10	10	10		12	11	11	11.3333	15.7	16.3	18	13.9	16.7	16.12		13	13	13	13	22.9	21.5	21.9	26.6	26.5	23.88		10	10	11	10.3333	20.3	30	16.3	15.1	14.1	19.16
RHZ110125Wildberg	cold	6	6	6	6		8	7	9	8		9	9	9	9		11	11	12	11.3333	15.6	24.7	16.6			18.9667		13	13	13	13	33.1	23	21.2	24.1	16	23.48		12	11	9	10.6667	33.2	37.5	26.1	28.9	15.1	28.16
RHZ110127BtschwilZwiselen	cold	6	5	5	5.33333		7	8	7	7.33333		9	9	9	9		11	10	10	10.3333	20.6	18.5	15.9	15.8	16.6	17.48		12	13	12	12.3333	19	24.5	24.9	26.2	20.2	22.96		11	12	10	11	19.1	19.7	14.6	26.5	16.3	19.24
Rodrigo	cold	5	6	5	5.33333		7	8	8	7.66667		8	9	10	9		12	11	11	11.3333	19.9	18.6	22.7			20.4		14	13	12	13	25.7	25.6	17.4	19.4	18.6	21.34		11	9	10	10	17.6	16.3	14.6	26	25.7	20.04
Rosetta	cold	6	6	6	6		7	8	8	7.66667		9	10	9	9.33333		12	11	10	11	14.1	15.4	18.5			16		13	13	12	12.6667	15.9	22	24.9	15.1	15.9	18.76		12	11	11	11.3333	12.8	11.8	17.1	12	12.8	13.3
Solomon	cold	5	6	5	5.33333		7	8	8	7.66667		9	9	10	9.33333		11	10	11	10.6667	24	24.9	25.9	21.3	20.5	23.32		13	13	11	12.3333	27.4	20.3	24.1	21.6	20.4	22.76		11	10	9	10	16.4	21.5	29.7	22.1	17.2	21.38
Soriento	cold	6	5	5	5.33333		8	7	7	7.33333		10	9	9	9.33333		10	11	11	10.6667	19.7	20.7	15.7	16.4	18.3	18.16		12	13	12	12.3333	27.4	30.3	19.9	18.1	27	24.54		10	9	9	9.33333	20.5	22.7	16.1	22.8	21.6	20.74
Stefani	cold	5	5	5	5		7	7	7	7		9	8	9	8.66667		9	10	9	9.33333	26.8	26.2	34.9			29.3		11	12	10	11	17.5	17.9	27.9	19.6	18.7	20.32		9	9	9	9	18.6	24.6	20.5	16.9	20	20.12
Twymax	cold	5	5	6	5.33333		8	7	8	7.66667		8	9	9	8.66667		10	11	10	10.3333	18.2	27.1	33.1	21.6	29.7	25.94		12	12	13	12.3333	34.4	29.7	30.2	32.6	28.6	31.1		10	10	10	10	35.3	33.8	16.8	15.3	17.9	23.82
AberAvon	control	10	9	9	9.33333		14	14	15	14.3333		21	21	20	20.6667		25	23	24	24	32.8	29.7	22.6	27.4	30.8	28.66		26	27	30	27.6667	30.4	25.3	22.2	29	33.6	28.1		20	23	17	20	22.9	29.5	22	17.8	17	21.84
AberChoice	control	9	10	9	9.33333		15	14	15	14.6667		24	21	23	22.6667		26	30	28	28	24.1	20	39.1	31.8	25.1	28.02		33	29	31	31	38.1	27.2	24.9	27.8	29.6	29.52		24	21	25	23.3333	28.8	33.9	41.2	22.5	24.7	30.22
AberClyde	control	9	10	9	9.33333		16	17	16	16.3333		21	20	21	20.6667		21	24	21	22	34	26.1	30.5	24.6	26.5	28.34		24	28	26	26	30.1	25.3	26.5	30	19.8	26.34		18	22	22	20.6667	24.5	27.5	31	22.3	31	27.26
AberDart	control	10	10	10	10		15	17	18	16.6667		23	23	24	23.3333		27	26	26	26.3333	30.5	29.8	27	39.6	30.6	31.5		28	33	31	30.6667	21.8	36.7	21.7	26.5	33.9	28.12		25	20	21	22	26.7	26.9	24.1	28.9	23.1	25.94
AberGain	control	10	9	9	9.33333		18	16	16	16.6667		26	24	25	25		28	27	28	27.6667	23.1	25.6	42.1	23.7	27.3	28.36		30	28	31	29.6667	34.5	30.6	31.3	28.8	33	31.64		25	22	19	22	24.6	27.3	24.5	32.6	34.7	28.74
AberGreen	control	8	8	9	8.33333		15	15	13	14.3333		21	21	20	20.6667		25	26	26	25.6667	23.1	22.7	26.7	25.4	30.5	25.68		32	32	33	32.3333	29.5	23.5	24.3	28.3	21	25.32		24	18	22	21.3333	23.4	17.3	32.7	17.2	18.5	21.82
AberZeus	control	9	9	10	9.33333		15	15	14	14.6667		23	22	22	22.3333		25	26	25	25.3333	36.5	24.9	24.6	33.8	25.6	29.08		29	29	29	29	26.6	22.6	23.4	22.8	27.1	24.5		21	22	20	21	16.6	24.6	26	17.2	21.2	21.12
ARARA	control	11	10	10	10.3333		19	17	16	17.3333		19	20	19	19.3333		24	24	23	23.6667	20.2	30.8	27.2	17.4	21.4	23.4		25	25	25	25	25.2	24.4	20.7	29.2	27.3	25.36		20	20	21	20.3333	22.2	17.5	16.6	18.2	18.8	18.66
AROLUS	control	10	11	10	10.3333		17	17	19	17.6667		21	20	20	20.3333		25	25	27	25.6667	35.6	34.5	30.6	28.8	29.5	31.8		31	28	27	28.6667	31.3	29.6	25.9	25.1	27	27.78		24	18	23	21.6667	27.4	28.7	24.9	24.7	22.5	25.64
Astonenergy	control	11	11	11	11		19	20	19	19.3333		24	22	22	22.6667		31	30	32	31	28.7	26.9	32.6	33	31.7	30.58		29	36	33	32.6667	25.5	31.4	19.7	31.7	33.9	28.44		25	23	24	24	26.7	32	31.8	30.2	29.8	30.1
Ba14088	control	10	10	9	9.66667		18	16	20	18		21	23	22	22		26	24	24	24.6667	30.4	23.4	31.8	32.9	21.1	27.92		26	27	27	26.6667	29.2	24.8	23.9	28.3	24.1	26.06		21	17	17	18.3333	18.5	16.9	21.2	17.7	20.7	19
Ba14125	control	10	10	9	9.66667		15	14	13	14		22	19	21	20.6667		22	23	22	22.3333	23.1	24.8	20	28.4	29	25.06		24	24	24	24	21.8	21.4	23.9	27.7	23.8	23.72		18	15	18	17	23	16.9	20.8	24.4	17.9	20.6
Ba14155	control	9	10	10	9.66667		14	14	15	14.3333		21	20	20	20.3333		23	24	24	23.6667	35.7	24.4	23.4	19.5	19	24.4		26	26	27	26.3333	26	30.7	22.5	28.5	23.5	26.24		24	21	23	22.6667	24.6	18.7	22	17.1	18.8	20.24
BAR01	control	11	11	10	10.6667		13	15	15	14.3333		16	18	21	18.3333		25	25	23	24.3333	17.7	28.2	29.4	31.3	26.8	26.68		27	26	27	26.6667	20.1	28.8	24.6	22.3	20.6	23.28		17	18	19	18	15.3	19.1	15.8	19	19.2	17.68
BAR02	control	9	9	9	9		16	14	14	14.6667		22	23	21	22		22	20	21	21	20.6	17.3	20.5	24	25.3	21.54		25	25	27	25.6667	27.3	19.4	27.2	20.3	17.9	22.42		18	20	19	19	12	16.1	15	16.3	22.9	16.46
BAR03	control	9	9	10	9.33333		16	17	19	17.3333		23	24	22	23		26	25	25	25.3333	21.7	27.5	29.3	29.2	26.8	26.9		29	28	29	28.6667	28.9	24.3	29.3	22.5	27.7	26.54		22	21	18	20.3333	25	27.6	20.9	28.9	17.9	24.06
BAR04	control	8	9	9	8.66667		16	17	18	17		23	26	24	24.3333		27	30	27	28	22.5	36.3	22.1	21.2	25.2	25.46		30	31	30	30.3333	24.2	29.2	22.7	34.1	22.6	26.56		19	18	20	19	17	14.7	20	19.9	18.1	17.94
BAR05	control	13	12	11	12		18	18	19	18.3333		24	23	21	22.6667		29	26	26	27	27.4	20.1	20.6	25.1	27.3	24.1		31	31	28	30	27.5	29.1	28.5	23.2	18.8	25.42		19	23	21	21	29.5	28.5	24.9	19.2	19.6	24.34
BAR06	control	10	9	10	9.66667		15	14	15	14.6667		22	23	22	22.3333		28	28	28	28	23.9	28.5	23.9	25.2	22.7	24.84		31	33	33	32.3333	23.6	31.6	29.3	22.9	22.7	26.02		26	25	26	25.6667	23.6	25.1	18.6	17.8	27.1	22.44
BAR07	control	9	9	9	9		16	16	17	16.3333		23	23	24	23.3333		26	24	25	25	33.1	21.6	34.6	25.6	25.7	28.12		31	29	30	30	23.9	34	26.1	20.8	29.2	26.8		20	21	21	20.6667	30.3	28.2	18	17.5	16.6	22.12
BAR08	control	10	10	10	10		16	17	15	16		21	22	21	21.3333		24	24	24	24	28.7	27.1	36	24	29.4	29.04		24	24	26	24.6667	28.6	29.2	34	26.6	26.6	29		19	19	20	19.3333	20.2	19	16.5	17.2	27.8	20.14
BAR09	control	10	12	12	11.3333		17	18	18	17.6667		26	26	26	26		29	27	26	27.3333	24.3	26.6	26	32.6	28.3	27.56		31	31	32	31.3333	25.8	27.9	33.5	25.7	26.3	27.84		21	24	22	22.3333	20.5	29	28.8	23.7	20.5	24.5
BAR10	control	10	11	10	10.3333		17	18	19	18		20	17	20	19		28	28	28	28	33.3	33.5	33.5	27.8	33.4	32.3		29	30	29	29.3333	25.7	30.3	32.4	30	26.2	28.92		22	24	24	23.3333	28.8	32.7	25.8	21.6	28.6	27.5
Cancan	control	10	9	10	9.66667		16	17	18	17		24	23	21	22.6667		29	27	28	28	29.4	24	31.9	27.2	18.9	26.28		29	29	28	28.6667	23.2	28.1	21.7	30.5	19.3	24.56		24	25	24	24.3333	19	16.4	17.1	20	17.7	18.04
Carraig	control	8	9	8	8.33333		15	13	13	13.6667		22	22	21	21.6667		24	23	24	23.6667	25.9	23.5	32.9	26.8	28	27.42		28	28	28	28	33.5	26.4	35.3	28.5	30.7	30.88		22	23	21	22	25.6	26.4	20.7	16	29.1	23.56
Cashel	control	11	10	10	10.3333		16	16	19	17		22	24	23	23		26	25	26	25.6667	27.9	32.9	28.8	20.3	28.8	27.74		31	32	30	31	27.6	27.2	31	28.9	31	29.14		24	24	21	23	26.6	22.1	17.7	24.4	19.8	22.12
Denver	control	10	10	10	10		17	17	18	17.3333		23	24	21	22.6667		26	25	24	25	27	25.2	33.6	25.5	24.7	27.2		28	28	30	28.6667	27.7	25.7	30.5	27.6	29.2	28.14		21	19	19	19.6667	21.6	20.9	34.1	26.7	21.5	24.96
Giant	control	9	10	10	9.66667		18	16	17	17		21	21	20	20.6667		26	25	26	25.6667	32	27.3	41	29	35.4	32.94		32	30	32	31.3333	27.3	38.7	37.2	34	30.6	33.56		21	20	22	21	19.7	18.1	30.6	29.9	27.8	25.22
Glencar	control	10	11	11	10.6667		17	17	15	16.3333		19	20	19	19.3333		24	24	23	23.6667	28.9	41.2	36.5	34.1	32.1	34.56		28	28	27	27.6667	35.9	20	29.2	32.9	32.5	30.1		25	21	24	23.3333	20.4	19	18.8	19	16.9	18.82
Glenveagh	control	10	9	10	9.66667		16	16	17	16.3333		21	21	20	20.6667		26	25	27	26	29.1	22.4	27.2	27.3	34.1	28.02		30	30	27	29	30.8	21	28.4	26.3	27.8	26.86		20	20	19	19.6667	18.4	23.6	17.6	15.3	20.3	19.04
January	control	9	10	10	9.66667		15	15	15	15		20	20	19	19.6667		21	21	22	21.3333	23.3	21.9	23.1	21	26.7	23.2		24	23	24	23.6667	23.4	20.2	21.4	26.1	22.3	22.68		19	18	16	17.6667	16.8	19.9	27.7	22.4	15.9	20.54
Kintyre	control	8	9	8	8.33333		14	18	17	16.3333		20	19	22	20.3333		24	27	25	25.3333	23.4	31.3	34	28.2	26.4	28.66		27	30	31	29.3333	36.6	28.3	35.8	31.4	32.2	32.86		20	22	22	21.3333	28.6	28.5	25	41.1	22.6	29.16
LP0035	control	13	11	11	11.6667		19	20	18	19		23	23	24	23.3333		25	25	25	25	22.2	28.2	23.9	29.2	23	25.3		28	28	28	28	31.5	36.1	30	29.4	30.6	31.52		21	19	21	20.3333	33.1	18.9	42.3	24.7	34.7	30.74
LP0055(AROTIS)	control	11	10	10	10.3333		17	17	18	17.3333		22	21	20	21		24	24	22	23.3333	26.3	26.3	26.4	22.7	31.2	26.58		23	25	22	23.3333	27.5	30.9	21.5	28.3	24.7	26.58		16	13	17	15.3333	19.6	19.4	23.4	16.3	22.1	20.16
LP0075	control	10	10	9	9.66667		14	15	15	14.6667		22	19	20	20.3333		28	30	26	28	21.8	28.7	21.6	31	29	26.42		33	31	31	31.6667	21.5	28.5	24.4	17.5	24.2	23.22		27	23	22	24	21.5	23.6	24	28.1	17.8	23
LP0105	control	9	8	9	8.66667		17	16	18	17		24	24	27	25		28	26	27	27	24.2	27.5	30.1	23.9	22.5	25.64		33	29	31	31	27.7	24.5	30.7	24.8	23.6	26.26		23	21	22	22	24.4	31.7	26.6	28.6	22.6	26.78
LP0425	control	10	10	10	10		18	18	18	18		22	22	21	21.6667		27	26	27	26.6667	30	30.1	19.7	24	24.6	25.68		28	26	27	27	26	24.9	29.1	24.2	29.6	26.76		21	23	18	20.6667	17.1	19.5	18.3	16.3	19.8	18.2
LP0515	control	10	10	9	9.66667		16	18	17	17		23	21	23	22.3333		24	25	26	25	35.4	29.4	32.8	24	21.4	28.6		26	27	28	27	34.3	31.7	25.5	28	33.9	30.68		21	20	18	19.6667	23.3	17.2	24.5	27.5	22.7	23.04
LP1005	control	10	9	10	9.66667		19	19	18	18.6667		23	23	24	23.3333		24	26	24	24.6667	25	26.3	20.7	26	22.5	24.1		24	26	29	26.3333	24.7	20.1	22.6	20.6	22.8	22.16		17	19	19	18.3333	28.2	27.7	17	19.1	15.7	21.54
LP9155(CANIS)	control	10	11	11	10.6667		17	17	16	16.6667		21	22	20	21		24	23	23	23.3333	39.1	30.3	28.1	30.8	21.9	30.04		30	31	31	30.6667	22.7	28.6	33.3	33.3	32.9	30.16		21	22	21	21.3333	22.4	16.7	29.7	25	23.3	23.42
LP9435(ARUGA)	control	10	11	12	11		20	18	20	19.3333		27	26	24	25.6667		31	31	31	31	28.4	30	22.6	28.5	26	27.1		34	33	33	33.3333	27.5	33.6	34.7	26.3	36	31.62		24	22	20	22	24.3	21.4	22.4	23.3	21.5	22.58
LP9535	control	9	10	9	9.33333		18	18	20	18.6667		22	24	24	23.3333		27	28	27	27.3333	31.2	34.4	22.5	20.9	26.5	27.1		31	28	30	29.6667	24.4	29.7	20.6	37.8	28.2	28.14		16	19	21	18.6667	28.8	32	41.6	17.5	25.3	29.04
Magician	control	10	10	11	10.3333		17	18	19	18		24	26	24	24.6667		31	30	30	30.3333	26.3	34	27.1	23.6	26	27.4		36	33	31	33.3333	35	24.1	31.4	29.7	33	30.64		28	21	22	23.6667	29.4	23.9	25.4	20.6	25.5	24.96
Majestic	control	10	10	9	9.66667		17	18	16	17		23	24	25	24		27	28	28	27.6667	25.8	26.2	26.3	26.5	21.7	25.3		28	31	31	30	21.1	27.7	30.8	31.2	22.2	26.6		21	24	25	23.3333	21.5	25.8	26.2	21	29.8	24.86
Millenium	control	9	9	10	9.33333		16	16	17	16.3333		22	20	19	20.3333		27	28	25	26.6667	39.4	29.9	29.3	37.2	30.1	33.18		31	30	29	30	39.2	28.2	31.4	35.3	34.6	33.74		22	19	23	21.3333	28.9	26	23.4	18.5	37	26.76
Picadilly	control	9	9	10	9.33333		17	16	16	16.3333		23	21	20	21.3333		24	23	24	23.6667	25.5	33.2	19.5	29.5	22.3	26		28	28	27	27.6667	31.4	32.4	31.1	27.3	20.4	28.52		26	21	24	23.6667	22.1	17.3	29.8	21.9	31.2	24.46
Premium	control	10	10	11	10.3333		17	18	17	17.3333		23	22	24	23		29	26	27	27.3333	40	35.7	29.8	28.2	28.3	32.4		32	31	33	32	37.3	36.9	39.1	35	36.5	36.96		26	27	29	27.3333	31.8	29.6	37.3	30.2	25.4	30.86
RHZ110123Ottoberg	control	10	11	10	10.3333		19	17	19	18.3333		29	27	25	27		30	29	30	29.6667	28.5	25.7	31.8	29.7	22.1	27.56		28	29	30	29	22.7	24.8	20.3	22.9	29.5	24.04		26	22	24	24	19.4	26.4	24.1	29.6	28.8	25.66
RHZ110124MmliswilPasswang	control	11	10	11	10.6667		18	18	18	18		17	15	18	16.6667		20	21	22	21	24.7	29.3	22.1	23.5	22.9	24.5		22	23	23	22.6667	28.2	28.2	23.6	28.3	23.8	26.42		21	22	18	20.3333	25	28.4	29.1	17.5	23	24.6
RHZ110125Wildberg	control	11	10	10	10.3333		18	18	19	18.3333		23	21	21	21.6667		24	22	24	23.3333	29.8	24.2	26.4	21.8	38.8	28.2		29	25	23	25.6667	36.5	33.7	31.7	27.4	0	25.86		23	21	20	21.3333	26.2	33.1	25.9	27.9	26.9	28
RHZ110127BtschwilZwiselen	control	9	9	9	9		16	17	17	16.6667		21	20	24	21.6667		27	25	26	26	31.9	29.5	30.7	24.7	34.7	30.3		26	28	28	27.3333	27.2	28.6	29.1	24.5	20.7	26.02		21	23	19	21	30.3	19	14	26.5	13.9	20.74
Rodrigo	control	9	9	10	9.33333		16	16	15	15.6667		18	18	17	17.6667		25	24	25	24.6667	26.1	28	35.8	30.8	25.3	29.2		27	28	32	29	35.8	27.4	25.8	23	32	28.8		20	20	22	20.6667	25.6	23.9	21.9	20	20	22.28
Rosetta	control	10	10	10	10		17	19	17	17.6667		24	25	25	24.6667		24	25	26	25	26.7	17.3	24.9	28	19.3	23.24		29	25	26	26.6667	24.8	23.7	20.3	23.3	21.6	22.74		22	21	21	21.3333		17.2	23.9	20.7	20.8	16.52
Solomon	control	9	9	9	9		19	18	17	18		21	23	20	21.3333		25	24	25	24.6667	24.7	27	27.5	26.9	19.9	25.2		26	26	27	26.3333	32.1	35.2	24.1	23.8	30.8	29.2		18	19	19	18.6667	20.4	16	18.7	28.1	37.2	24.08
Soriento	control	9	9	10	9.33333		16	14	16	15.3333		20	22	19	20.3333		21	21	20	20.6667	22.4	33.1	26.6	24.9	44.2	30.24		23	23	22	22.6667	40.6	31.2	23.3	29.6	32.9	31.52		21	19	22	20.6667	25.6	18.5	17.4	30.2	24.4	23.22
Stefani	control	9	9	10	9.33333		17	17	16	16.6667		19	19	20	19.3333		23	21	22	22	32.1	29.2	30.4	30.6	23.8	29.22		25	26	26	25.6667	39.8	35.6	27	37.5	25	32.98		19	20	21	20	19.4	20.2	22.2	26.9	24.7	22.68
Twymax	control	10	9	9	9.33333		15	15	15	15		21	21	22	21.3333		26	25	25	25.3333	29.8	40.3	29.7	45	23.5	33.66		28	27	26	27	38.4	28.6	35.8	26.8	35	32.92		21	20	20	20.3333	17.8	42.2	33.7	17.4	33.4	28.9
[truncated: 72 more columns]

## Sheet: exp3
accession	treatment	height 30.5.2016	height 30.5.2016	height 30.5.2016	height 30.5.2016	average height 30.5.2016		height 6.6.2016	height 6.6.2016	height 6.6.2016	height 6.6.2016	average height 6.6.2016		height 13.6.2016	height 13.6.2016	height 13.6.2016	height 13.6.2016	average height 13.6.2016	SPAD 13.6.2016	SPAD 13.6.2016	SPAD 13.6.2016	SPAD 13.6.2016	SPAD 13.6.2016	average SPAD 13.6.2016		height 20.6.2016	height 20.6.2016	height 20.6.2016	height 20.6.2016	average height 20.6.2016	SPAD 20.6.2016	SPAD 20.6.2016	SPAD 20.6.2016	SPAD 20.6.2016	SPAD 20.6.2016	average SPAD 20.6.2016		height 27.6.2016	height 27.6.2016	height 27.6.2016	height 27.6.2016	average height 27.6.2016	SPAD 27.6.2016	SPAD 27.6.2016	SPAD 27.6.2016	SPAD 27.6.2016	SPAD 27.6.2016	average SPAD 27.6.2016
		measurement 1	measurement 2	measurement 3	measurement 4			measurement 1	measurement 2	measurement 3	measurement 4			measurement 1	measurement 2	measurement 3	measurement 4		measurement 1	measurement 2	measurement 3	measurement 4	measurement 5			measurement 1	measurement 2	measurement 3	measurement 4		measurement 1	measurement 2	measurement 3	measurement 4	measurement 5			measurement 1	measurement 2	measurement 3	measurement 4		measurement 1	measurement 2	measurement 3	measurement 4	measurement 5
AberAvon	cold	5	5	6	5	5.25		6	6	5	5	5.5		8	9	8	8	8.25	17.4	17.2	12.6	14.8	13.8	15.16		10	11	10	11	10.5	25.5	25.9	23.7	21.8	21.2	23.62		13	13	12	12	12.5	20.3	22.9	32.8	27.8	27	26.16
AberChoice	cold	6	6	5	6	5.75		6	5	4	5	5		11	10	8	10	9.75	25	12.2	20.9	25.5	16.5	20.02		10	12	10	10	10.5	27.8	20.7	23.4	30.6	24.5	25.4		13	15	12	13	13.25	33.9	31.3	30.4	25.1	29.6	30.06
AberClyde	cold	6	6	5.5	6	5.875		5	5	6	5	5.25		9	7	8	8	8	20.1	19	27.7	30	17.8	22.92		11	10	10	12	10.75	22.9	25.9	33.6	40.2	38.4	32.2		12	12	12	14	12.5	37.1	30.4	29.7	42.1	46	37.06
AberDart	cold	6	6	5.5	5	5.625		6	5	6	6	5.75		8	8	7	9	8	22.2	17.9	26.7	18.1	17.5	20.48		10	9	12	12	10.75	27.7	27.4	25.1	20.4	33.4	26.8		13	12	12	14	12.75	34	20.3	25	31.5	23.6	26.88
AberGain	cold	5	5.5	5	5	5.125		7	8	7	7	7.25		10	10	9	9	9.5	21	20.4	10.7	13.7	12.5	15.66		12	12	13	13	12.5	25.2	19.8	23.4	28.2	31.3	25.58		15	14	15	13	14.25	22.7	34.9	41.2	32.7	39.6	34.22
AberGreen	cold	4.5	5.5	6	5	5.25		6	6	5	6	5.75		10	9	9	10	9.5	20.8	26.2	14.6	26.1	15.3	20.6		12	12	10	12	11.5	19.5	24	30.1	33.5	30	27.42		14	15	13	13	13.75	33.4	37.6	29.1	31.1	21.5	30.54
AberZeus	cold	5	5	5	5.5	5.125		6	5	5	4	5		9	8	10	8	8.75	27	37	28.1	17.2	32.3	28.32		9	10	10	9	9.5	38.3	23.6	24.4	29.8	41.1	31.44		11	13	13	11	12	47.3	23	50.3	39.7	38.5	39.76
ARARA	cold	5.5	6	5.5	6	5.75		8	9	8	7	8		9	9	9	9	9	26	25.3	18.7	24.3	26.7	24.2		11	10	11	11	10.75	34.6	46.1	30	23.5	32.1	33.26		13	14	13	14	13.5	29.1	36.3	37	32.6	27.5	32.5
AROLUS	cold	6	6	5.5	5.5	5.75		8	7	7	8	7.5		10	9	9	10	9.5	17.1	28.3	22.6	29.1	26.2	24.66		13	11	12	12	12	35.6	32.6	34.3	33.7	28.7	32.98		15	15	15	13	14.5	39.8	34.4	39.5	47.1	35.7	39.3
Astonenergy	cold	5	6	6	6	5.75		6	7	4	5	5.5		8	9	9	10	9	19.2	11.3	17.1	12.9	11.8	14.46		11	13	13	11	12	27.5	25	18.5	22.4	19.8	22.64		14	15	14	13	14	18.8	37.1	24.8	24.9	17.3	24.58
Ba14088	cold	5	5.5	6.5	6.5	5.875		7	5	5	6	5.75		9	10	8	9	9	31	27.1	23.9	27.1	24	26.62		11	14	9	10	11	41.6	34.4	24.8	26.7	29.9	31.48		13	14	12	12	12.75	23.2	20.8	20.3	38.6	33.5	27.28
Ba14125	cold	5	5.5	6	6	5.625		5	5	6	4	5		8	9	10	8	8.75	19.7	19.7	17	21.3	19.5	19.44		9	12	9	12	10.5	25.2	27.6	26.9	29.3	23.3	26.46		12	13	12	13	12.5	24.5	36.1	28.6	25.5	29.4	28.82
Ba14155	cold	5	6	6.5	5.5	5.75		7	4	5	4	5		7	8	8	9	8	12.6	13.9	13.7	20.6	11.8	14.52		11	11	10	10	10.5	23.2	25.7	24.2	28.3	39.5	28.18		14	15	12	12	13.25	25.8	29.3	29.2	25.4	31.3	28.2
BAR01	cold	6.5	5	5	7	5.875		8	6	7	9	7.5		7	8	9	7	7.75	14.5	17.4	13.4	14.2	14.5	14.8		13	10	9	11	10.75	22.8	25.9	26.1	20	22.8	23.52		14	13	12	14	13.25	22.8	21.3	30.9	24.8	26	25.16
BAR02	cold	6	6	5	6	5.75		8	8	8	7	7.75		10	10	9	10	9.75	17.8	22.9	13	15.2	16.7	17.12		13	12	11	12	12	23.2	24.3	24	30.2	15.2	23.38		14	14	14	15	14.25	45.2	28.6	25.2	38.2	24.6	32.36
BAR03	cold	5	6	5.5	6	5.625		7	8	7	5	6.75		8	9	9	9	8.75	14.4	19.5	19.6	15.6	17.6	17.34		11	10	7	11	9.75	21.8	20	23.5	17.3	23.3	21.18		14	13	11	13	12.75	26.7	32.6	22	29.3	36.1	29.34
BAR04	cold	6	6	6	5.5	5.875		6	7	8	7	7		10	11	10	9	10	24.3	25.2	24.3	31.8	27.2	26.56		11	11	11	9	10.5	33.2	24.6	29.6	21.5	30.6	27.9		14	15	13	11	13.25	36.5	31.7	23.5	31.7	35.8	31.84
BAR05	cold	5	5	4.5	5	4.875		7	7	6	5	6.25		8	8	7	7	7.5	19.2	30.1	38.9	17.3	12.3	23.56		9	10	9	10	9.5	25.8	31.5	22.4	24.6	41.1	29.08		11	12	11	13	11.75	36	34	27.6	48.3	31.9	35.56
BAR06	cold	4.5	5	6	5.5	5.25		8	6	7	8	7.25		11	10	10	8	9.75	23.1	15.2	28.3	25.2	19.9	22.34		12	11	10	12	11.25	24.9	26.2	27.2	29.9	24.6	26.56		14	13	11	13	12.75	31.2	16.3	27.8	23.2	32.7	26.24
BAR07	cold	4.5	4	4	4.5	4.25		6	7	7	7	6.75		7	6	8	9	7.5	17.7	21.5	24.4	19.1	19.2	20.38		10	9	10	8	9.25	23.4	17.4	17.8	14.4	16.3	17.86		12	11	12	10	11.25	32.1	37.4	30.3	27.3	22.5	29.92
BAR08	cold	5	5	5	5	5		8	8	7	6	7.25		9	8	8	10	8.75	24	31.6	22.3	27.9	24.2	26		11	12	10	12	11.25	29.6	35.1	31.5	32.9	35.9	33		12	13	13	14	13	35.1	32.7	31.3	32.5	36.4	33.6
BAR09	cold	4.5	6	5	6	5.375		5	6	8	7	6.5		7	9	9	10	8.75	19.7	19.9	11.8	16.3	12.8	16.1		14	13	13	12	13	24.9	25.6	28.3	22.2	26	25.4		16	15	15	14	15	26.4	29.3	26.9	30.9	25.8	27.86
BAR10	cold	5.5	6	6	4.5	5.5		7	5	7	8	6.75		10	11	10	9	10	21.8	21.2	45.9	20.6	19.5	25.8		12	13	13	12	12.5	26.2	28.2	27.9	34.7	22.1	27.82		17	16	17	16	16.5	35.4	34	35.6	35.3	31.9	34.44
Cancan	cold	5.5	5	5	6	5.375		5	4	6	6	5.25		8	9	9	10	9	11.4	12.6	13.5	11.9	17.2	13.32		12	11	10	11	11	21.9	16.4	14.8	26.6	20	19.94		16	12	12	13	13.25	27.3	23.2	25.1	23.7	17.4	23.34
Carraig	cold	6	6.5	6.5	6	6.25		7	6	6	6	6.25		11	10	11	10	10.5	10.8	11.2	13.5	18.4	13.3	13.44		11	11	11	10	10.75	17.5	17.7	22	20.1	15.9	18.64		15	15	15	13	14.5	24.8	34.7	33.2	23.4	20.6	27.34
Cashel	cold	6	6	5.5	5.5	5.75		6	7	7	6	6.5		8	8	7	9	8	17.6	22.1	19.3	28.8	14.1	20.38		11	11	12	11	11.25	27.3	34.5	29.4	36.9	29.1	31.44		14	13	14	14	13.75	30.7	22.3	40.9	39.4	33.2	33.3
Denver	cold	6	6	6	5.5	5.875		6	7	7	5	6.25		9	8	8	9	8.5	20.3	28.1	30	36.2	30	28.92		8	11	12	12	10.75	31	30.4	33.8	20.4	36.9	30.5		12	13	13	13	12.75	23.4	38.4	25.3	37.5	38.2	32.56
Giant	cold	5	6	6	5	5.5		6	6	7	5	6		8	9	10	8	8.75	12.7	14.3	14.7	13.3	11.4	13.28		11	12	11	13	11.75	22.2	26.7	20.8	21.6	22.8	22.82		13	15	14	17	14.75	25.7	28.6	23.8	22.9	26.4	25.48
Glencar	cold	6	6	5.5	6	5.875		6	7	6	6	6.25		10	10	9	10	9.75	29.4	19.3	19.7	23.7	38.1	26.04		11	12	13	13	12.25	25	21	38.9	17.5	25.7	25.62		13	13	16	13	13.75	40.2	32	28.8	34.6	42.6	35.64
Glenveagh	cold	5	5.5	5.5	6	5.5		5	4	4	5	4.5		15	8	8	7.5	9.625	12.1	13.1	17.7	17.2	11.5	14.32		10	9	10	10	9.75	14.7	15.7	16	23.4	13.5	16.66		13	13	11	13	12.5	23.5	30.5	24	21.2	27.2	25.28
January	cold	5.5	5	5	6	5.375		5	6	6	4	5.25		9	9	8	9	8.75	20.3	25.4	13.9	23.1	13.1	19.16		11	10	12	11	11	20.4	19	25.6	26.9	16.4	21.66		14	15	14	14	14.25	31.7	35.3	25.2	23.5	25.4	28.22
Kintyre	cold	6	6	6	5.5	5.875		7	6	6	5	6		9	9	8	7	8.25	27.2	16.3	17.4	25.3	19	21.04		10	11	10	11	10.5	23.1	20.2	25.3	23.5	30.9	24.6		12	13	12	12	12.25	24.6	34.8	31.5	21.2	28	28.02
LP0035	cold	5	6	6	6	5.75		7	7	7	8	7.25		8	8	8	9	8.25	13	18.8	12.3	18.5	12.6	15.04		10	10	11	10	10.25	30.3	26.5	21.3	25.8	23.1	25.4		12	13	10	14	12.25	31.4	28.9	29.9	29.5	25.7	29.08
LP0055(AROTIS)	cold	6	5.5	5	6	5.625		8	8	7	7	7.5		9	8	8	10	8.75	25.1	22.5	14	19.6	15.6	19.36		11	12	11	12	11.5	21.6	19.7	27.4	31.2	24.7	24.92		14	14	12	13	13.25	24.8	28.3	28.2	32.5	36.7	30.1
LP0075	cold	6	6	5	6	5.75		9	9	9	8	8.75		10	10	10	9	9.75	27	18.4	27	27.8	32.2	26.48		10	12	13	13	12	34.3	33.7	31.6	32.4	28.9	32.18		14	15	16	17	15.5	37	36.9	41.3	40.4	33.4	37.8
LP0105	cold	5	5.5	5	5	5.125		8	7	8	8	7.75		9	10	10	8	9.25	15.6	19	18.2	19.6	16.9	17.86		13	11	12	13	12.25	25	26.8	23.5	22.8	26.1	24.84		15	15	14	14	14.5	32.1	30.1	28.2	23.2	38.5	30.42
LP0425	cold	6	6	5	6	5.75		7	8	7	8	7.5		9	8	7	9	8.25	14.8	14.9	22.6	22.1	22.6	19.4		9	11	12	10	10.5	29.9	23.6	21.5	25	19.6	23.92		11	13	13	11	12	39.9	25.1	21.5	28.2	49.6	32.86
LP0515	cold	5	5	5.5	6	5.375		7	8	7	7	7.25		7	9	9	8	8.25	18.8	23.9	15.1	15	25.8	19.72		9	12	11	11	10.75	25	23.4	21.9	19.9	20.8	22.2		14	15	13	14	14	25.1	20.3	29.7	23.1	22.3	24.1
LP1005	cold	6	6	5.5	6	5.875		8	6	8	6	7		10	9	9	9	9.25	21.6	16.5	22.3	24.9	17.3	20.52		11	12	13	12	12	32.4	31	28	20.9	25.2	27.5		13	13	14	13	13.25	23.1	27.3	26.5	31	28.3	27.24
LP9155(CANIS)	cold	6	5.5	6	5	5.625		8	8	9	7	8		10	9	10	9	9.5	26.3	18.4	25.2	18.3	18.9	21.42		12	12	13	11	12	30.7	23.1	24.3	24	26.9	25.8		13	14	15	15	14.25	30	23.4	29.5	25.1	26.1	26.82
LP9435(ARUGA)	cold	5.5	6.5	6	6	6		7	7	8	7	7.25		8	7	9	9	8.25	29.5	29.6	17.3	31.6	26.7	26.94		11	12	10	12	11.25	38.3	45.5	21.9	36.5	29.5	34.34		14	13	13	13	13.25	38.4	26.4	41.4	39.3	29.5	35
LP9535	cold	5	5	5	5.5	5.125		8	8	8	6	7.5		8.5	8	9	9	8.625	19.1	15	18.8	23.3	13.7	17.98		11	12	12	13	12	26.8	33.1	31.4	32.2	25	29.7		14	14	14	14	14	36.3	30.9	28.3	32.7	41.1	33.86
Magician	cold	5	6	6	5.5	5.625		7	7	5	7	6.5		10	9	9	11	9.75	17.7	14.5	18.1	18.7	14.3	16.66		13	13	13	13	13	29.6	18.4	32.8	19.9	21.7	24.48		15	14	14	15	14.5	25.9	23.2	26.5	27.4	29.9	26.58
Majestic	cold	5	5	6	5	5.25		6	6	5	5	5.5		8	7	8	8	7.75	21.1	23.8	13.4	20.4	20.8	19.9		10	10	12	10	10.5	21.4	27	30	20.7	25.7	24.96		10	12	14	13	12.25	28.1	18.2	28.4	26.8	34.1	27.12
Millenium	cold	6	6	6	5.5	5.875		5	6	6	6	5.75		8	8	10	8	8.5	26.2	16.9	21.4	22.2	34.3	24.2		12	10	10	11	10.75	29.6	29.5	24.8	39.1	34.5	31.5		14	12	13	15	13.5	46.8	36.3	32.6	42.7	35.5	38.78
Picadilly	cold	4.5	5	5	6	5.125		6	6	5	4	5.25		10	8	6	8	8	27.1	15.9	14.7	13.7	16.8	17.64		9	10	9	9	9.25	16	18.7	15	13.9	16.3	15.98		12	13	13	9	11.75	14.5	18.4	18.2	13.8	25	17.98
Premium	cold	5	5.5	4.5	5	5		4	3	5	5	4.25		9	9	9	10	9.25	19.3	12.1	14.6	12.6	16.9	15.1		9	11	8	9	9.25	15.6	14	16.5	25.1	19.7	18.18		13	14	13	14	13.5	23.5	18.3	19.8	18.8	13	18.68
RHZ110123Ottoberg	cold	6	5.5	6	5	5.625		6	6	6	6	6		9	9	8	9	8.75	19.8	15.8	15.2	19.4	15	17.04		12	12	12	12	12	28	28.1	32.9	33.4	26.3	29.74		15	14	14	14	14.25	31.5	33.6	34.2	22.6	26.4	29.66
RHZ110124MmliswilPasswang	cold	6	5	5	5	5.25		7	7	7	6	6.75		6.5	6.5	9	8.5	7.625	12.1	15.7	10.9	13	15.5	13.44		11	10	9	11	10.25	20.1	26.1	23.2	23.1	19.4	22.38		13	12	12	13	12.5	27.3	26	17.2	28.6	25.7	24.96
RHZ110125Wildberg	cold	5	5.5	5.5	5.5	5.375		7	7	6	6	6.5		9	8	8.5	8	8.375	14.9	23.4	18.9	27.5	18.3	20.6		11	9	9	10	9.75	27.7	22.4	20.4	27.8	32.7	26.2		13	13	12	12	12.5	32.6	29.7	47.1	28.8	46	36.84
RHZ110127BtschwilZwiselen	cold	5	5	5	4.5	4.875		7	6	7	6	6.5		9	8	9	9	8.75	22.8	21.7	11.2	17.5	11.7	16.98		12	11	11	11	11.25	30.8	28.9	22.8	22.9	20.6	25.2		13	13	13	13	13	26.2	27.3	24.8	28.1	26.9	26.66
Rodrigo	cold	7	6	6.5	6	6.375		7	5	5	6	5.75		10	9	11	9	9.75	26.6	20.1	27.1	16.9	18.4	21.82		13	13	11	12	12.25	29	42.1	26.4	23.3	28.7	29.9		14	15	13	15	14.25	26.7	35	27.9	33	27	29.92
Rosetta	cold	5	5	5.5	6	5.375		6	5	5.5	4	5.125		9	7	6	6	7	13.1	13.8	14.5	15.6	18.6	15.12		9	9	11	10	9.75	17.7	17.2	18.5	20.2	17	18.12		12	10	15	13	12.5	26.7	17.3	17.4	16.1	23.9	20.28
Solomon	cold	5	5	5.5	5.5	5.25		5	5	3	6	4.75		9	9	11	10	9.75	13.5	16.1	19.4	15.2	15.8	16		11	12	9	9	10.25	14.9	24.7	23.9	11.1	22.6	19.44		13	14	11	11	12.25	20.5	20.7	20.6	16	17.5	19.06
Soriento	cold	5.5	5	5	5	5.125		5	5	6	5	5.25		9	9	8	8	8.5	12.4	14.3	22.3	20.9	18.8	17.74		11	12	11	11	11.25	24.3	26.7	23.6	25.3	23.8	24.74		14	14	13	13	13.5	34.7	35.3	26.4	28.3	30.6	31.06
Stefani	cold	5	5.5	5.5	5	5.25		6	5	3	4	4.5		9	8	8	7	8	14.9	15.3	13.1	16.7	16.9	15.38		9	10	11	9	9.75	21.2	18.4	20.4	18.3	20.9	19.84		12	14	13	12	12.75	24.1	21.6	25.4	28.1	33.6	26.56
Twymax	cold	6.5	6	5.5	6	6		5	6	8	6	6.25		8	10	9	8	8.75	16.5	13.7	13.3	25.7	23	18.44		12	13	13	13	12.75	27.2	35	33	30.7	38.1	32.8		14	14	13	15	14	38.5	41.4	27.3	46.7	43.5	39.48
AberAvon	control	8.5	10	11.5	11	10.25		16	15	17	16	16		18	20	22	22	20.5	38	37.7	26.4	34.3	34.1	34.1		25	26	24	25	25	34	27.5	25.1	24.3	34.9	29.16		28	25	25	29	26.75	30.8	30.5	33.7	32.5	34.6	32.42
AberChoice	control	10	10	11	11	10.5		12	12	14	15	13.25		20	18	21	24	20.75	28.1	21.5	17.3	28.5	23.9	23.86		28	23	20	22	23.25	32.5	34.8	34	25.9	39.9	33.42		30	26	21	25	25.5	31.4	33.2	29.3	34.7	29.4	31.6
AberClyde	control	10	7	13	12	10.5		16	12	15	15	14.5		25	26	29	25	26.25	26.6	31.7	32.3	37.2	32	31.96		29	27	26	25	26.75	41.2	39.7	44.9	37.3	36.2	39.86		27	30	28	30	28.75	49.8	32.6	41.6	37.7	43.4	41.02
AberDart	control	12	9	10	10	10.25		14	14	15	15	14.5		22	23	19	20	21	32.9	38.7	32.8	29.1	33.4	33.38		25	25	25	28	25.75	30	38.7	25	30.8	39.5	32.8		32	30	28	28	29.5	34.5	31.2	49.3	44	31	38
AberGain	control	11	11	11	11	11		15	15	15	13	14.5		26	24	24	26	25	42.1	39.5	30.9	37.7	43.1	38.66		28	25	28	30	27.75	28.8	38.4	35.2	35.6	29.2	33.44		28	28	29	29	28.5	36.9	34.8	36.5	36.9	37	36.42
AberGreen	control	10	10	10.5	13.5	11		15	15	18	16	16		28	31	28	25	28	28.7	32.2	32.5	34.4	31.1	31.78		27	27	25	23	25.5	34.9	33.3	27	24.4	30.9	30.1		33	31	30	27	30.25	28.7	30.1	32.6	30.5	31.1	30.6
AberZeus	control	12	8	9	13	10.5		16	15	15	16	15.5		24	25	25	23	24.25	33	17.9	35.3	37.8		31		27	24	26	25	25.5	26.9	35.5	24	36.1	36.6	31.82		27	30	28	29	28.5	30	29.7	42.2	33	32.2	33.42
ARARA	control	12	9	12	11	11		17	15	17	17	16.5		18	18	16	21	18.25	34.8	25.6	86.1	33.9	30.1	42.1		31	32	25	24	28	42.7	29.1	32.7	34	28.4	33.38		30	30	31	32	30.75	26.3	28.8	29	27.9	27.9	27.98
AROLUS	control	8.5	11.5	11	10	10.25		18	18	17	18	17.75		27	28	27	27	27.25	24.5	26.7	32.7	40.4	31.3	31.12		28	30	31	29	29.5	29.2	31.6	28.5	28.7	30.4	29.68		31	32	31	28	30.5	30.2	31.3	32.5	31.5	31.6	31.42
Astonenergy	control	9.5	13	11	10	10.875		17	18	18	15	17		29	27	30	33	29.75	21.4	24.7	29.5	41.6	29.3	29.3		27	30	27	32	29	28.6	27.8	37.9	33	46.3	34.72		37	35	34	38	36	30.1	34.1	31.2	32.5	33	32.18
Ba14088	control	10	10	11	10.5	10.375		16	16	17	17	16.5		21	21	23	24	22.25	29	32.3	39.6	32.3	33	33.24		23	26	21	24	23.5	31.8	28.9	31	37	31.6	32.06		27	27	30	26	27.5	35.5	38.6	36.9	32.4	27.6	34.2
Ba14125	control	7	12	10	11	10		18	21	19	19	19.25		27	29	30	29	28.75	39.1	33.1	32.5	34.9	27.5	33.42		33	33	27	29	30.5	36.3	28.7	33.3	38	40.7	35.4		34	33	35	34	34	30.3	31.8	34.8	27.1	39.3	32.66
Ba14155	control	9	10	11	10	10		11	14	15	15	13.75		25	26	24	25	25	31.1	24.3	20.7	37.4	38.9	30.48		30	29	28	23	27.5	30.9	34.2	30.2	38.8	38.6	34.54		29	31	29	31	30	34.7	28	35.7	37.6	38.5	34.9
BAR01	control	10	8	11	11	10		14	16	15	15	15		26	23	21	26	24	25.1	33.3	34.7	31.5	31.2	31.16		29	25	26	27	26.75	36	36.6	36.9	31.2	37.8	35.7		29	26	26	28	27.25	32.2	39.4	30.7	32.5	30.8	33.12
BAR02	control	10	11	12	10	10.75		15	14	16	16	15.25		24	27	24	25	25	39.9	25.9	33	27.4	36.9	32.62		29	30	28	28	28.75	30.7	30.5	30.3	31.8	38.2	32.3		32	33	30	31	31.5	37.2	35.1	28.6	37	36.8	34.94
BAR03	control	10	7	11	9	9.25		18	16	17	16	16.75		22	23	26	24	23.75	23.1	34.6	28.4	34	30	30.02		30	29	27	26	28	35.1	30.4	32.6	32.5	27.4	31.6		27	31	28	27	28.25	35.1	36.3	33.7	34.8	30.5	34.08
BAR04	control	9	11.5	12	11	10.875		14	15	14	13	14		15	16	23	21	18.75	30.4	28	24.1	35.7	29.6	29.56		25	20	20	28	23.25	34.1	38.3	33.9	31.6	36.7	34.92		24	27	24	22	24.25	34.5	21.3	30.6	34.9	33.7	31
BAR05	control	11	9.5	9.5	11.5	10.375		15	14	16	17	15.5		21	21	21	22	21.25	29.1	26.4	20	32.2	26.9	26.92		24	28	25	23	25	33.5	37.4	24.3	42.1	29.2	33.3		28	26	29	28	27.75	35.3	35.9	25.5	27.9	26	30.12
BAR06	control	10.5	9.5	11	9	10		17	14	16	16	15.75		21	22	26	27	24	26.9	29.9	39.9	21.7	29.6	29.6		26	28	29	26	27.25	28.2	39.9	36.5	30.8	32.9	33.66		27	29	30	27	28.25	31.4	41.6	32.6	26.6	26.9	31.82
BAR07	control	12	11	11	10	11		16	17	18	18	17.25		23	23	22	24	23	29.5	37.2	34.2	35.7	23.6	32.04		26	26	27	26	26.25	32.7	29.2	43.1	32.6	33	34.12		30	28	23	27	27	28.8	36.3	40.1	27.5	28	32.14
BAR08	control	9	8	11.5	10	9.625		14	13	14	13	13.5		24	22	20	21	21.75	35.2	27.5	26.6	23.6	35.2	29.62		25	29	24	25	25.75	31.6	26.6	26.3	32.3	36.1	30.58		27	27	26	24	26	43.2	28.4	30.6	29.5	35.8	33.5
BAR09	control	9	11	10.5	11	10.375		18	18	18	17	17.75		25	29	28	28	27.5	27.3	22.2	30.3	29.3	27.3	27.28		29	27	27	27	27.5	27.3	28.9	32	30.8	27.7	29.34		32	29	33	27	30.25	30.8	29.3	31.1	35.3	29.4	31.18
BAR10	control	7	12	7.5	10.5	9.25		13	14	17	15	14.75		23	23	28	29	25.75								28	29	26	25	27	41	36.1	37.5	32.2	30.1	35.38		31	33	33	32	32.25	36.5	42	37.6	35.8	41.8	38.74
Cancan	control	9	9	10	12	10		17	16	16	16	16.25		27	23	25	24	24.75	26.1	31.3	37.7	35.9	32.8	32.76		30	28	27	27	28	28.5	38.3	323.1	37	30.6	91.5		32	35	33	33	33.25	40.9	33.8	32.3	39.1	35.6	36.34
Carraig	control	11	11	10	11	10.75		16	17	16	15	16		34	29	29	29	30.25	37.2	35.9	34	30.3	34.4	34.36		31	29	30	31	30.25	26.9	29.2	34.4	34.8	28.8	30.82		34	36	32	32	33.5	39	34.3	31.8	39.9	32.4	35.48
Cashel	control	10	12	9.5	10.5	10.5		12	14	12	14	13		23	21	24	22	22.5	35.4	35.3	36.7	21.7	32.3	32.28		23	28	23	26	25	33.9	36.4	33.7	32.5	36.8	34.66		26	26	28	28	27	31.6	34.6	32.8	34.7	32.7	33.28
Denver	control	8	9	11	8.5	9.125		16	14	16	14	15		22	18	21	21	20.5	23.1	29.4	32.8	33.1	29.6	29.6		26	28	21	20	23.75	36.7	34	30.4	30.7	32.2	32.8		26	29	25	30	27.5	33.6	33.8	35.9	30.6	39.3	34.64
Giant	control	11	10	10	12	10.75		14	15	15	17	15.25		26	29	28	27	27.5	25.6	39.1	39.3	41.2		36.3		30	31	30	26	29.25	37.6	47.6	41.1	39.4	37	40.54		31	31	30	34	31.5	39.1	42.3	40.6	36.3	26.7	37
Glencar	control	11	11	8	9	9.75		17	16	17	18	17		30	29	23	25	26.75	34.3	24.6	28.9	38.5	31.6	31.58		30	29	32	29	30	32.4	27.5	33.2	29.2	35.9	31.64		34	35	36	35	35	48.1	31.4	36.9	28.4	31.3	35.22
Glenveagh	control	12	12	14	10	12		15	17	20	17	17.25		25	22	29	30	26.5	35.6	33.7	27.5	28.9	31.4	31.42		27	30	32	30	29.75	27.4	42.4	31.9	32.6	38.4	34.54		30	31	33	31	31.25	36.4	31.9	25.6	24.4	35.3	30.72
January	control	9.5	11.5	10	11	10.5		19	18	18	18	18.25		26	25	24	21	24	40.7	37.9	30.5	37.6	36.7	36.68		29	27	27	26	27.25	24.9	33.5	24.1	29.9	34.4	29.36		28	29	26	30	28.25	28.9	35.5	27.9	26.1	28.7	29.42
Kintyre	control	9.5	9	10.5	8.5	9.375		14	13	15	16	14.5		29	29	30	28	29	30.1	39.3	36.8	37.5	33.2	35.38		31	33	31	35	32.5	36.4	40.5	34.1	26.8	30.8	33.72		30	33	34	32	32.25	30.6	30.5	33.4	30.7	29.3	30.9
LP0035	control	12	9	10	12	10.75		17	16	15	16	16		24	25	24	23	24	34.8	29.4	22.2	29	33.3	29.74		24	24	28	26	25.5	29.4	28.8	36.3	33.3	32.3	32.02		27	30	30	31	29.5	31	33.8	33.2	35	28	32.2
LP0055(AROTIS)	control	11.5	9	12	12.5	11.25		18	12	13	17	15		24	21	24	24	23.25	32.6	26.5	23.9	33.1	29	29.02		22	26	27	25	25	35.9	25.1	36.6	33.7	40.8	34.42		26	31	29	28	28.5	33.8	39.9	30.2	35.8	27.6	33.46
LP0075	control	9	11	13	11	11		11	14	12	11	12		21	17	23	20	20.25	31.1	26	36.5	34.6	32.5	32.14		20	22	21	16	19.75	32.4	28.6	40.1	29.4	29.9	32.08		26	28	28	27	27.25	40.5	40.2	30.2	33.6	44.4	37.78
LP0105	control	11.5	10.5	10.5	12	11.125		16	17	17	16	16.5		27	27	28	27	27.25	36.7	25.9	31.7	21.7		29		28	26	27	27	27	33.8	32.9	36.6	31.1	28.2	32.52		30	31	32	28	30.25	35.5	33.8	37.3	40.9	39.9	37.48
LP0425	control	11.5	13	13	12.5	12.5		19	17	18	19	18.25		28	29	29	29	28.75	39.1	29.5	33.8	32.3	33.5	33.64		29	27	27	30	28.25	35.8	37.4	33.3	41.8	29.4	35.54		30	31	30	32	30.75	40	32.9	42.2	28.9	35.2	35.84
LP0515	control	9	10	12	11.5	10.625		17	16	14	15	15.5		20	26	27	26	24.75	29.7	28.1	43.6	30.6	33	33		30	31	23	30	28.5	28.9	33.8	28.5	35.8	37.9	32.98		29	26	25	29	27.25	32	29	46.4	30.4	31.5	33.86
LP1005	control	11	11	9.5	10.5	10.5		16	15	14	16	15.25		26	25	24	24	24.75	30.7	25.2	26.1	26.1	36.7	28.96		29	26	26	28	27.25	31.3	28.6	33.1	30.5	33.6	31.42		29	29	32	31	30.25	42.5	28.2	36.7	31.4	24.6	32.68
LP9155(CANIS)	control	9	11.5	12.5	10	10.75		15	16	15	15	15.25		21	24	21	23	22.25	37.5	33.8	36.8	33.9	21.8	32.76		27	23	26	27	25.75	24.7	30.9	35.5	36.4	38	33.1		30	29	30	30	29.75	44	31.7	39.2	38.9	32.5	37.26
LP9435(ARUGA)	control	14.5	12	9	8	10.875		14	18	16	26	18.5		25	26	26	27	26	21.7	36.5	26.6	27	28	27.96		21	26	28	28	25.75	35.8	38.7	35.5	33.1	33	35.22		32	32	29	31	31	37.6	30.8	32.1	44.9	37.5	36.58
LP9535	control	11	10	13	11	11.25		18	17	17	18	17.5		24	27	28	26	26.25	36	24.8	28.5	33.9	30.8	30.8		29	26	27	31	28.25	27.5	36.7	45.8	33.6	35.3	35.78		30	30	27	30	29.25	28.5	36.4	28.2	31.1	37.7	32.38
Magician	control	10	13.5	12	11	11.625		16	15	17	16	16		25	24	25	29	25.75	30.2	31.7	30	38.4	32.6	32.58		31	25	33	30	29.75	34.7	32.9	34.4	36.9	33	34.38		34	34	35	32	33.75	43.6	38.7	31	31.1	42.5	37.38
Majestic	control	9	11	9.5	10	9.875		15	14	15	14	14.5		21	26	28	25	25	22.3	29.4	28.7	33.3	28.4	28.42		29	30	29	30	29.5	38	30.7	28.2	27.8	30.2	30.98		30	32	30	31	30.75	33.4	24.3	32.7	31.1	25.4	29.38
Millenium	control	12	10	11	10	10.75		17	16	18	14	16.25		23	23	24	25	23.75	28.6	25.3	23.4	27.5	26.2	26.2		32	27	31	28	29.5	35.2	35.1	31.5	33.1	36.3	34.24		31	30	33	28	30.5	30.2	31.5	35.6	31.7	30.8	31.96
Picadilly	control	11	10	13	10	11		16	14	16	14	15		27	27	26	28	27	39.1	36	27.9	25.9	32.2	32.22		29	30	29	32	30	26.6	23	26	30	30.4	27.2		32	32	32	32	32	38.1	31.7	34.3	34.7	33.8	34.52
Premium	control	9	12.5	6	9	9.125		15	15	15	17	15.5		23	26	27	27	25.75	21.5	35.7	24.6	34.6	29.1	29.1		27	26	28	25	26.5	32.4	25.5	32	30.2	38.3	31.68		32	33	33	34	33	28.5	30.3	37	34.1	37.1	33.4
RHZ110123Ottoberg	control	11	10	10	9.5	10.125		16	18	17	16	16.75		28	27	30	26	27.75	34.7	32.4	30.6	29	35.6	32.46		25	28	27	32	28	28.6	32.7	29.8	27.9	28.7	29.54		31	33	33	30	31.75	36.1	30.9	47.8	30	30.4	35.04
RHZ110124MmliswilPasswang	control	9.5	10	10.5	10	10		17	16	15	16	16		26	23	24	22	23.75	31.4	35.7	42.1	42	37.6	37.76		28	24	29	28	27.25	37.6	36.8	28.2	27.7	24.5	30.96		26	28	30	38	30.5	36.3	30.6	33.3	27.5	30.1	31.56
RHZ110125Wildberg	control	12	10	10	11	10.75		16	15	17	17	16.25		26	28	21	27	25.5	28.6	29.2	32.1	30.9	30.2	30.2		28	24	31	29	28	37	25.1	28.5	30.8	28	29.88		32	29	29	29	29.75	33.6	31.8	36.1	34	29.7	33.04
RHZ110127BtschwilZwiselen	control	9	11.5	12	11	10.875		18	18	18	19	18.25		22	24	23	24	23.25	24.2	31.1	32.3	27.5	28.8	28.78		25	22	21	24	23	38.3	33.4	40.9	29.8	34.2	35.32		28	28	31	31	29.5	33.3	32.5	33	40.8	32.8	34.48
Rodrigo	control	8	9	10	10	9.25		15	15	15	16	15.25		26	24	25	25	25	18.6	22.8	36.5	24.3	25.6	25.56		29	23	24	28	26	39	40.5	39.1	36.6	35.1	38.06		31	30	27	30	29.5	31.4	34	38.4	38.7	37.9	36.08
Rosetta	control	10.5	7.5	10	12	10		15	14.5	14	15.5	14.75		27	23	26	25	25.25	20.7	23.2	31	22.3	24.3	24.3		30	39	28	25	30.5	37	40.8	33.2	34	28.2	34.64		29	32	29	32	30.5	35.2	30.5	39.8	28.9	26.6	32.2
Solomon	control	12	12	11.5	10	11.375		16	18	18	19	17.75		28	29	26	30	28.25	30.6	30.2	24.8	30.5	29	29.02		29	29	28	31	29.25	26.9	32.9	28.6	33.7	30	30.42		33	31	32	32	32	29.8	29.6	29.9	33.3	31.4	30.8
Soriento	control	13.5	11	8.5	9	10.5		13	16	13	14	14		22	22	25	21	22.5	38.5	26.9	29.4	38.2	33.5	33.3		23	26	30	28	26.75	31.5	33.7	29.7	32.2	31.9	31.8		28	32	30	27	29.25	35.8	34.2	30.9	27.4	30.8	31.82
Stefani	control	10	11.5	12	9	10.625		16	17	17	18	17		26	23	28	28	26.25	30	37.1	30	30	31.8	31.78		30	26	26	27	27.25	34.2	34.4	30	34.4	34.2	33.44		31	30	33	30	31	32.5	37.9	31.5	26.7	26.7	31.06
Twymax	control	10	9	10	11	10		15	15	15	14	14.75		25	25	24	22	24	36.5	27.4	36.1	44.4	36.1	36.1		26	26	30	24	26.5	38.6	32.3	30.5	41.5	45.7	37.72		30	30	29	29	29.5	37.4	34.6	43.2	36	25.3	35.3
[truncated: 87 more columns]
