# Supplementary material for: Growth under cold conditions in a wide perennial ryegrass panel is under tight physiological control
Source: PeerJ journal article supplement (doi:10.7717/peerj.5520), 2018-09-11
Supplement: Supplemental_Materials_Figure_1.pdf [file Supplemental_Materials_Figure_1.pdf]

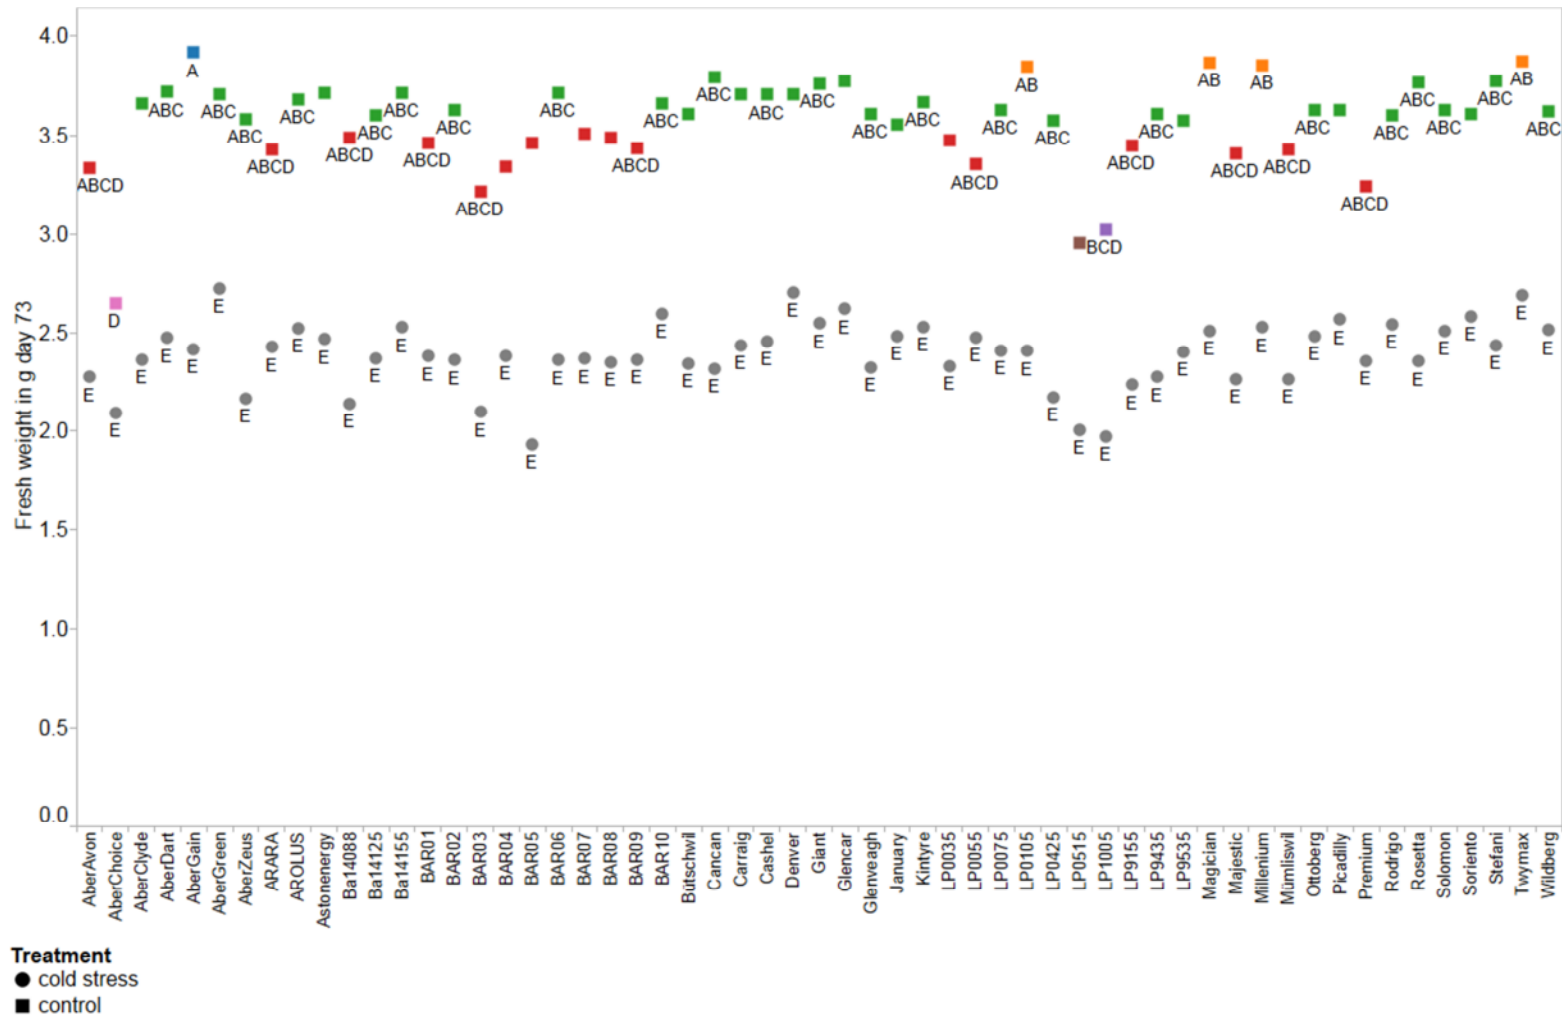

**Supplemental Materials Figure 1:** Fresh weight (g) at day 73 for the 57 accessions grown under cold stress and control conditions. The letters represent significant different groups according to an ANOVA test and a Tukey ranking test. Both accession and treatment were highly significant.
