# Supplementary material for: Growth under cold conditions in a wide perennial ryegrass panel is under tight physiological control
Source: PeerJ journal article supplement (doi:10.7717/peerj.5520), 2018-09-11
Supplement: Supplemental_Materials_Figure_4.pdf [file Supplemental_Materials_Figure_4.pdf]

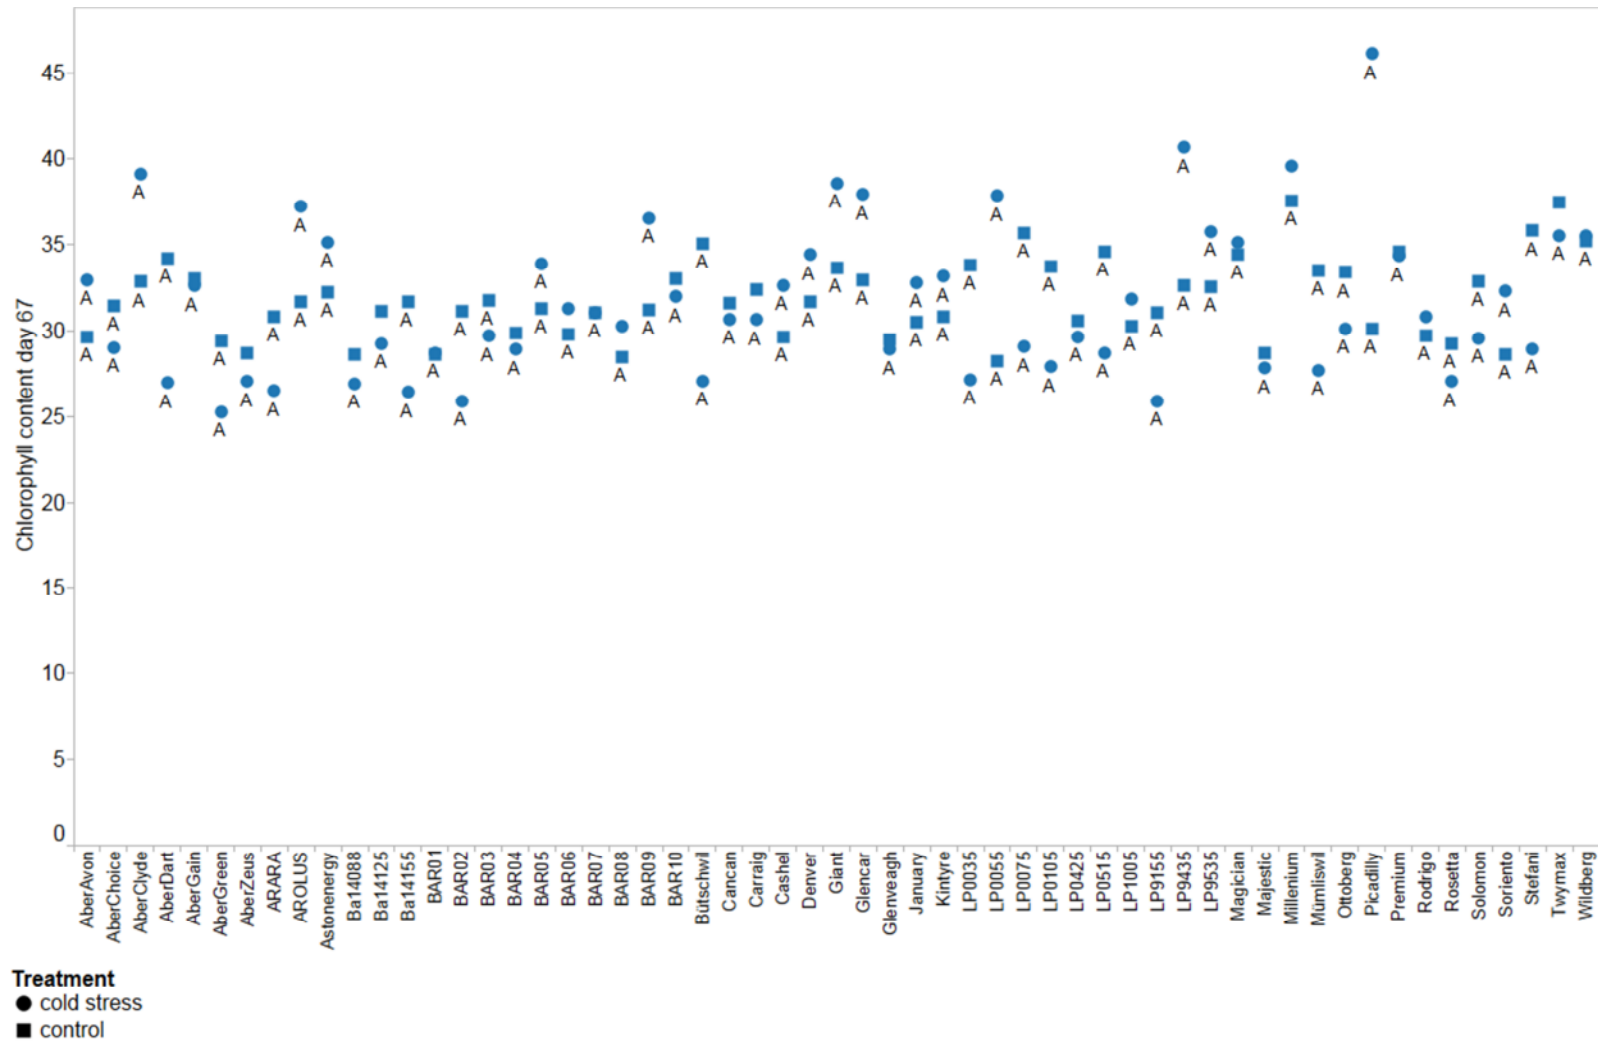

**Supplemental Materials Figure 4:** Chlorophyll content at day 67 of the 57 accessions grown under cold stress and control conditions. The letters represent significant different groups according to an ANOVA test and a Tukey ranking test. Neither factor, accession or treatment, was significant.
