# Supplementary material for: Growth under cold conditions in a wide perennial ryegrass panel is under tight physiological control
Source: PeerJ journal article supplement (doi:10.7717/peerj.5520), 2018-09-11
Supplement: Supplemental_Materials_Figure_5.pdf [file Supplemental_Materials_Figure_5.pdf]

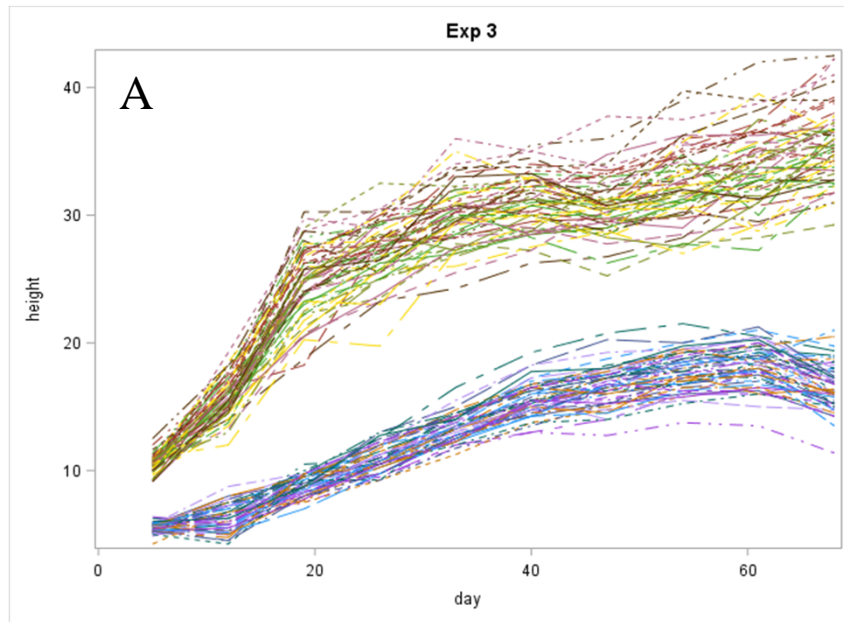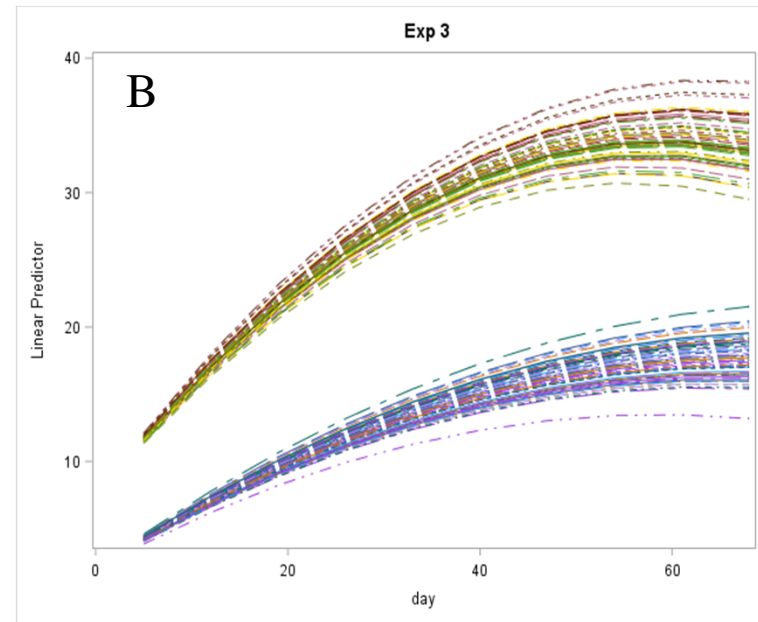

**Supplemental Materials Figure 5:** (A) Plotted growth height raw data of experiment 3 for control and cold treatment and (B) modelled growth height data of experiment 3 for control and cold treatment.
